# Supplementary material for: Uncertainties in eddy covariance air-sea CO 2 flux measurements and implications for gas transfer velocity parameterisations
Source: Copernicus journal article supplement (doi:10.5194/acp-2021-120), 2021-02-19
Supplement: Supplementary file 1 [file acp-2021-120-supplement.zip]

Archive with 5 entries (5 files):
- AMT28_uncertainty.txt
- AMT29_uncertainty.txt
- JR18006_uncertainty.txt
- JR18007_uncertainty.txt
- Uncertainty paper_Supplement.pdf
