# Supplementary material for: Uncertainties in eddy covariance air-sea CO 2 flux measurements and implications for gas transfer velocity parameterisations
Source: Copernicus journal article supplement (doi:10.5194/acp-2021-120), 2021-02-19
Supplement: Supplementary file 1 [file acp-2021-120-supplement.zip › JR18006_uncertainty.txt]

Datatime	Lon (o)	Lat(o)	co2flux (mmol/m2/day)	U10N (m/s)	dFR_Finkelstein (mmol/m2/day)	dFR_Blomquist (mmol/m2/day)	dFR_Wienhold (mmol/m2/day)	dFRN_Mauder (mmol/m2/day)	dFRN_Blomquist (mmol/m2/day)	dFRN_Billesbach (mmol/m2/day)	dFS_Lenschow (mmol/m2/day)	dF_all (mmol/m2/day)
2019063018.0	2.5499	53.1855	nan	nan	nan	nan	nan	nan	nan	nan	nan	nan
2019063019.0	2.6178	53.3382	nan	nan	nan	nan	nan	nan	nan	nan	nan	nan
2019063020.0	2.6542	53.5019	nan	nan	nan	nan	nan	nan	nan	nan	nan	nan
2019063021.0	2.6749	53.6714	-10.5107	nan	5.9024	1.3725	7.4095	0.4194	0.467	0.4814	0.1783	5.9051
2019063022.0	2.6789	53.8505	4.8337	nan	1.2726	2.7718	1.1617	0.332	0.3704	0.3029	0.1052	1.2769
2019063023.0	2.7177	54.0285	nan	nan	nan	nan	nan	nan	nan	nan	nan	nan
2019070100.0	2.7478	54.1993	-12.42	nan	2.9963	6.8003	3.8715	0.7761	0.8909	1.1575	1.0305	3.1686
2019070101.0	2.777	54.3745	nan	nan	nan	nan	nan	nan	nan	nan	nan	nan
2019070102.0	2.8031	54.548	nan	nan	nan	nan	nan	nan	nan	nan	nan	nan
2019070103.0	2.8315	54.7153	nan	nan	nan	nan	nan	nan	nan	nan	nan	nan
2019070104.0	2.8557	54.8796	nan	nan	nan	nan	nan	nan	nan	nan	nan	nan
2019070105.0	2.8804	55.0439	nan	nan	nan	nan	nan	nan	nan	nan	nan	nan
2019070106.0	2.9065	55.2087	9.0183	nan	3.2237	2.9233	3.7034	1.337	1.3346	1.0457	0.1958	3.2296
2019070107.0	2.9339	55.3817	-2.379	nan	3.9964	5.0085	4.2414	1.5277	1.5173	1.3434	0.369	4.0134
2019070108.0	2.9621	55.5568	-4.7956	nan	4.3485	3.9105	4.272	1.5232	1.5149	1.5558	0.2515	4.3558
2019070109.0	2.9895	55.7276	-1.2799	nan	3.7256	4.6433	5.2128	1.4559	1.4392	1.2893	0.3771	3.7446
2019070110.0	3.0167	55.8966	nan	nan	nan	nan	nan	nan	nan	nan	nan	nan
2019070111.0	3.0472	56.0667	-13.8178	nan	2.8909	3.7109	3.3472	1.3335	1.3323	1.2741	0.2951	2.9059
2019070112.0	3.0761	56.2351	-6.825	nan	5.9139	7.2042	5.7022	1.1397	1.1434	1.6555	0.8232	5.9709
2019070113.0	3.1051	56.4033	nan	nan	nan	nan	nan	nan	nan	nan	nan	nan
2019070114.0	3.1382	56.5693	-6.5291	nan	4.4811	4.9476	6.1831	1.3866	1.3906	1.352	0.5731	4.5176
2019070115.0	3.205	56.7339	-15.2202	nan	3.7656	3.7996	4.1398	1.4207	1.4257	1.311	0.1862	3.7702
2019070116.0	3.2749	56.8962	-12.8612	nan	3.4951	4.363	3.9165	1.5057	1.5257	1.5318	0.3499	3.5126
2019070117.0	3.3444	57.0523	-14.588	nan	4.5847	3.8306	3.7266	1.5459	1.5514	1.4198	0.2056	4.5893
2019070118.0	3.4407	57.1946	nan	nan	nan	nan	nan	nan	nan	nan	nan	nan
2019070119.0	3.4752	57.3443	-6.7484	nan	3.3896	4.1098	3.1648	1.2298	1.2469	1.0622	0.2812	3.4013
2019070120.0	3.531	57.5004	-9.5857	nan	3.2297	3.1674	3.282	1.1333	1.1473	1.051	0.1619	3.2337
2019070121.0	3.5977	57.6549	-18.0583	nan	3.5928	3.6363	3.2587	1.2219	1.2378	1.0825	0.2299	3.6002
2019070122.0	3.6645	57.7997	-7.6136	nan	4.0054	4.3143	5.4154	1.4519	1.4701	1.3241	0.3172	4.018
2019070123.0	3.7244	57.9337	-26.6811	nan	3.8949	4.3038	3.3227	1.4596	1.479	1.195	0.2064	3.9003
2019070200.0	3.7829	58.067	-21.7685	nan	4.6498	4.3249	4.5793	1.3415	1.3736	1.2061	0.3988	4.6669
2019070201.0	3.8392	58.1996	-22.5575	nan	4.1326	4.1169	4.6186	1.2754	1.295	1.3238	0.2609	4.1408
2019070202.0	3.9	58.3363	-22.2021	nan	3.3706	3.8611	3.1753	1.2353	1.2488	1.2338	0.1219	3.3728
2019070203.0	3.9613	58.4767	-8.5285	nan	3.4759	3.4292	4.3906	1.1933	1.2097	1.1165	0.1549	3.4793
2019070204.0	4.023	58.6167	-4.3363	nan	3.6255	3.8108	3.5726	1.2169	1.2506	1.12	0.1713	3.6296
2019070205.0	4.0837	58.7538	-13.0003	nan	5.2727	3.8313	5.1575	1.1691	1.1911	1.1233	0.2526	5.2787
2019070206.0	4.1451	58.8966	-8.929	nan	3.885	4.1938	4.1638	1.0519	1.0896	1.0912	0.2309	3.8918
2019070207.0	4.1654	59.0521	-9.5288	nan	2.3866	3.1651	2.3398	0.9473	0.9669	0.785	0.2247	2.3971
2019070208.0	4.1562	59.2177	-11.5364	nan	2.8461	3.0696	3.3341	0.9528	0.9643	0.8672	0.2431	2.8564
2019070209.0	4.1591	59.3915	-10.4487	nan	3.228	3.456	3.3282	0.9215	0.9492	0.8984	0.2462	3.2374
2019070210.0	4.1721	59.572	-8.0695	nan	2.5274	2.9322	2.9578	0.8614	0.8841	0.754	0.1952	2.5349
2019070211.0	4.1737	59.7565	-6.9075	nan	3.7414	3.5993	3.4443	0.8878	0.9049	0.7641	0.1191	3.7433
2019070212.0	4.1752	59.9442	-6.0522	nan	2.974	3.0415	3.2393	0.833	0.8583	0.7988	0.2236	2.9824
2019070213.0	4.1756	60.1287	-5.1342	nan	2.7319	2.9438	2.5449	0.7986	0.8126	0.7548	0.1889	2.7384
2019070214.0	4.1804	60.3122	-16.0005	nan	4.8605	5.2208	4.7051	0.828	0.8551	0.9429	0.6067	4.8982
2019070215.0	4.1782	60.4744	-21.7277	nan	3.1833	4.1312	3.6168	0.9204	0.9487	0.8973	0.3397	3.2014
2019070216.0	4.1808	60.6316	-23.7036	nan	3.7728	5.1696	5.0616	1.0625	1.0881	1.2207	0.5894	3.8186
2019070217.0	4.1999	60.7799	nan	nan	nan	nan	nan	nan	nan	nan	nan	nan
2019070218.0	4.2433	60.9206	-19.389	nan	4.2775	12.6576	4.1698	1.3525	1.4222	1.4958	1.1475	4.4287
2019070219.0	4.2116	61.0802	-10.2763	nan	3.2318	4.8153	3.8266	1.1547	1.2006	1.1914	0.4212	3.2592
2019070220.0	4.1874	61.2538	-14.3141	nan	4.6127	4.3732	3.778	1.0872	1.1231	1.0554	0.3958	4.6297
2019070221.0	4.1859	61.4335	-4.8287	nan	5.0002	4.5453	5.8582	1.091	1.142	1.2128	0.2739	5.0077
2019070222.0	4.2018	61.622	-18.727	nan	4.1744	4.8062	4.2246	1.0429	1.0958	1.0062	0.3623	4.1901
2019070223.0	4.1906	61.8045	-17.7249	nan	4.0698	4.6455	3.5988	0.9577	1.0064	0.9654	0.3448	4.0844
2019070300.0	4.1881	61.9851	-11.4697	nan	3.1618	4.3893	3.434	0.9589	1.0095	0.9588	0.4586	3.1949
2019070301.0	4.1882	62.1656	-13.0847	nan	2.9249	3.0743	2.8624	0.8941	0.9227	0.7943	0.2015	2.9318
2019070302.0	4.1906	62.3502	-11.0593	nan	2.8376	3.7624	2.865	0.9946	1.0384	0.967	0.2378	2.8475
2019070303.0	4.188	62.5342	-21.139	nan	3.568	5.0999	4.2259	1.0407	1.0929	1.1703	0.6212	3.6217
2019070304.0	4.1881	62.718	-22.9087	nan	3.0907	3.5587	3.6308	1.0323	1.086	0.9187	0.2085	3.0977
2019070305.0	4.2047	62.9036	-21.9227	nan	4.8098	4.2664	3.6955	1.1509	1.2116	1.1868	0.3107	4.8199
2019070306.0	4.3338	63.0823	-24.7063	nan	6.3058	6.1322	6.3334	1.2838	1.3413	1.4073	0.6014	6.3344
2019070307.0	4.483	63.2513	-24.6565	nan	5.4288	5.4021	5.4778	1.1626	1.2294	1.1325	0.4227	5.4452
2019070308.0	4.6318	63.4186	-31.565	nan	5.7871	4.5281	6.1119	1.2427	1.2917	1.2234	0.336	5.7968
2019070309.0	4.7799	63.5849	-15.5049	nan	3.9331	4.3722	4.9206	1.2611	1.3183	1.2245	0.1257	3.9351
2019070310.0	4.9364	63.7505	-29.1024	nan	4.7195	3.6395	4.1385	1.0862	1.1284	1.1596	0.2713	4.7273
2019070311.0	5.0844	63.9173	-20.8312	nan	4.24	4.1375	4.0056	1.2012	1.2445	1.0463	0.2311	4.2463
2019070312.0	5.2333	64.0849	-6.9156	nan	4.2917	5.1444	4.1849	1.0885	1.1258	1.1506	0.3038	4.3025
2019070313.0	5.3905	64.2574	-8.5408	nan	3.9434	3.5928	5.2762	1.027	1.0754	0.9499	0.2863	3.9538
2019070314.0	5.568	64.4327	-15.1219	nan	4.1376	3.0773	3.7711	0.8782	0.9111	0.8953	0.3024	4.1486
2019070315.0	5.7221	64.6057	-15.9948	nan	3.5725	3.5358	3.3516	0.784	0.8102	0.8175	0.3315	3.5879
2019070316.0	5.8662	64.7811	-13.4789	nan	3.0679	3.2499	4.0925	0.6853	0.7078	0.7064	0.308	3.0833
2019070317.0	6.0363	64.9514	-9.5139	nan	1.9718	2.3452	1.8792	0.5752	0.5982	0.5826	0.1812	1.9801
2019070318.0	6.2137	65.1169	-4.4374	nan	3.2428	3.7968	3.9075	0.4506	0.4605	0.547	0.492	3.28
2019070319.0	6.4128	65.2784	-1.6637	nan	1.2168	1.4331	1.5072	0.3802	0.3863	0.3638	0.0351	1.2173
2019070320.0	6.6119	65.4419	-1.2732	nan	1.5671	1.6207	1.3583	0.4099	0.4111	0.3645	0.0565	1.5681
2019070321.0	6.8167	65.6051	-1.9548	nan	1.491	1.6421	2.01	0.3819	0.3853	0.353	0.1182	1.4957
2019070322.0	7.0144	65.7673	-3.7531	nan	1.3283	1.4505	1.5525	0.3711	0.3714	0.3453	0.0958	1.3317
2019070323.0	7.2176	65.9311	1.9596	nan	2.3925	2.0126	2.1415	0.4235	0.4256	0.4051	0.2336	2.4038
2019070400.0	7.4291	66.0968	-6.2864	nan	1.5071	1.5361	1.6165	0.4398	0.436	0.4079	0.0898	1.5098
2019070401.0	7.6465	66.2633	-2.8364	nan	3.1422	nan	2.8474	nan	nan	0.5228	nan	nan
2019070402.0	7.8579	66.4303	-6.6181	nan	3.378	3.4337	3.4319	0.6341	0.6383	0.5266	0.3271	3.3937
2019070403.0	8.0644	66.594	-16.2169	nan	3.8073	4.03	3.3998	0.8106	0.8133	0.9051	0.344	3.8228
2019070404.0	8.2748	66.7547	-19.9556	nan	3.0149	2.9472	2.8977	0.7866	0.7901	0.7408	0.1014	3.0166
2019070405.0	8.4856	66.9148	-16.368	nan	3.1398	3.3359	3.7539	0.7986	0.8026	0.7164	0.1742	3.1447
2019070406.0	8.6929	67.0721	-13.6917	nan	2.759	2.7297	2.5555	0.7672	0.7688	0.726	0.1468	2.7629
2019070407.0	8.9017	67.2266	-14.853	nan	2.4982	2.6857	2.5088	0.7033	0.709	0.6276	0.2174	2.5076
2019070408.0	9.1131	67.3851	-4.6375	nan	3.7415	4.0238	5.9668	0.705	0.719	0.6896	0.2866	3.7524
2019070409.0	9.325	67.5449	-15.3742	nan	2.6594	2.3882	2.0519	0.7098	0.7147	0.7405	0.1851	2.6658
2019070410.0	9.5379	67.6975	-12.5651	nan	2.1716	2.0314	1.8399	0.6929	0.6952	0.6172	0.1017	2.174
2019070411.0	9.7616	67.8674	-13.0557	nan	4.7985	7.4005	3.5069	0.6825	0.6899	0.9946	0.9697	4.8955
2019070412.0	9.9781	68.0263	-16.8979	nan	2.8872	2.9813	3.2735	0.7153	0.7148	0.7336	0.3383	2.907
2019070413.0	10.2471	68.1678	-6.7899	nan	2.4908	2.4093	2.2321	0.637	0.644	0.6503	0.1917	2.4982
2019070414.0	10.5886	68.2812	-13.5036	nan	2.984	3.2701	3.1172	0.6429	0.65	0.7265	0.3515	3.0046
2019070415.0	10.9379	68.3997	-10.3716	nan	1.88	1.7804	2.1893	0.6079	0.6153	0.5486	0.0399	1.8804
2019070416.0	11.2798	68.5144	-6.1252	nan	1.9427	1.9227	2.7684	0.5897	0.589	0.5838	0.1583	1.9491
2019070417.0	11.6193	68.6274	-7.0417	nan	2.2702	1.8331	2.557	0.5124	0.5127	0.5175	0.1864	2.2779
2019070418.0	11.9524	68.7426	-11.331	nan	2.3371	2.813	2.3005	0.5647	0.5745	0.6342	0.3257	2.3597
2019070419.0	12.2772	68.8487	-12.1823	nan	2.2399	2.8255	2.6363	0.5585	0.5656	0.6043	0.2859	2.258
2019070420.0	12.5995	68.9519	-7.0635	nan	1.3874	1.5609	1.6057	0.4797	0.4857	0.4235	0.0474	1.3882
2019070421.0	12.9196	69.058	-9.1566	nan	1.2535	1.2636	1.3727	0.4405	0.447	0.4233	0.0669	1.2552
2019070422.0	13.2447	69.1613	-7.0168	nan	1.3571	1.3199	1.1518	0.4579	0.4685	0.4353	0.0835	1.3597
2019070423.0	13.5724	69.2698	-22.6154	nan	4.7197	5.0385	5.1037	0.7381	0.7411	0.7657	0.6381	4.7626
2019070500.0	13.8842	69.3822	-26.6675	nan	5.117	6.2134	5.9159	1.1119	1.1442	1.133	0.5044	5.1418
2019070501.0	14.2174	69.4821	-19.0891	nan	6.0771	7.0594	6.7924	1.0788	1.1246	1.4137	0.7809	6.1271
2019070502.0	14.5508	69.5808	-24.3919	nan	6.4056	7.4401	6.772	0.8979	0.9237	1.161	1.003	6.4837
2019070503.0	14.8882	69.688	-23.9533	nan	3.8006	4.3585	3.6882	0.8672	0.9005	0.9392	0.3136	3.8135
2019070504.0	15.2429	69.7851	-26.0634	nan	4.8142	4.4863	4.6696	0.8156	0.8328	0.8415	0.2806	4.8224
2019070505.0	15.683	69.7929	nan	nan	nan	nan	nan	nan	nan	nan	nan	nan
2019070506.0	16.1457	69.781	-15.2738	nan	5.5277	6.1348	6.327	0.8505	0.8539	1.0062	0.5844	5.5585
2019070507.0	16.6181	69.7628	-12.6119	nan	2.7068	3.4417	2.1258	0.6446	0.659	0.6297	0.3256	2.7263
2019070508.0	17.0947	69.7446	-10.0968	nan	1.5373	1.5563	1.4028	0.5292	0.5268	0.4434	0.0605	1.5385
2019070509.0	17.5222	69.7314	-3.1282	nan	1.2029	1.2558	1.2592	0.298	0.2961	0.2935	0.0878	1.2061
2019070510.0	17.8126	69.654	nan	nan	nan	nan	nan	nan	nan	nan	nan	nan
2019070511.0	17.9659	69.5995	nan	nan	nan	nan	nan	nan	nan	nan	nan	nan
2019070512.0	17.9737	69.6016	nan	nan	nan	nan	nan	nan	nan	nan	nan	nan
2019070513.0	17.8819	69.6235	nan	nan	nan	nan	nan	nan	nan	nan	nan	nan
2019070514.0	17.6945	69.7687	-4.2296	nan	2.0863	2.6313	2.5155	0.298	0.3045	0.3705	0.2573	2.1021
2019070515.0	17.6778	69.9345	-0.0646	nan	3.0299	3.7013	3.7232	0.4191	0.4263	0.601	0.3758	3.0531
2019070516.0	17.687	70.0988	-0.5008	nan	0.7971	0.9541	0.712	0.2688	0.2706	0.2613	0.0818	0.8013
2019070517.0	17.6744	70.263	0.5113	nan	0.5545	0.5942	0.5766	0.2328	0.2313	0.2156	0.0186	0.5548
2019070518.0	17.6707	70.4268	-2.0142	nan	0.5666	0.6839	0.6144	0.285	0.2868	0.2371	0.0317	0.5674
2019070519.0	17.6806	70.5831	-0.1136	nan	1.1472	1.6235	1.0514	0.2754	0.2759	0.3059	0.1528	1.1574
2019070520.0	17.9629	70.698	-0.6672	nan	0.5552	0.5908	0.5949	0.225	0.227	0.1998	0.0279	0.5559
2019070521.0	18.3224	70.8027	-0.342	nan	0.686	1.0579	0.6951	0.2212	0.2239	0.2386	0.1346	0.6991
2019070522.0	18.6883	70.9115	-0.4824	nan	0.7341	0.7489	0.6896	0.2635	0.2648	0.244	0.0487	0.7357
2019070523.0	19.1066	71.0048	0.1637	nan	0.6319	0.6781	0.6494	0.2643	0.266	0.2458	0.0376	0.6331
2019070600.0	19.5958	71.0725	-2.1286	nan	0.7152	0.6535	0.8026	0.2433	0.243	0.2303	0.0323	0.716
2019070601.0	20.0959	71.1425	-0.8219	nan	1.1668	nan	1.1469	nan	nan	0.3666	nan	nan
2019070602.0	20.5851	71.2117	-4.237	nan	1.2688	1.2871	1.4769	0.3466	0.3486	0.3272	0.1007	1.2728
2019070603.0	21.0669	71.2808	-5.7013	nan	2.3381	2.472	1.9374	0.3859	0.3903	0.4659	0.286	2.3556
2019070604.0	21.5381	71.3478	-6.0544	nan	1.2137	1.8466	1.4569	0.3767	0.3768	0.3904	0.2311	1.2355
2019070605.0	22.0222	71.4177	4.1548	nan	3.3389	1.6911	2.8584	0.2796	0.2832	0.3674	0.2559	3.3487
2019070606.0	22.5133	71.4751	nan	nan	nan	nan	nan	nan	nan	nan	nan	nan
2019070607.0	22.7728	71.4958	-6.9079	nan	1.6279	1.9534	1.6479	0.3047	0.3072	0.2691	0.126	1.6327
2019070608.0	22.9534	71.5087	nan	nan	nan	nan	nan	nan	nan	nan	nan	nan
2019070609.0	23.4129	71.5511	-13.6272	nan	3.4986	3.4309	3.4723	0.666	0.6698	0.8152	0.3729	3.5184
2019070610.0	23.8635	71.6303	-21.5532	nan	2.4451	3.4183	2.3503	0.8218	0.8477	0.8022	0.3439	2.4692
2019070611.0	24.325	71.7065	-30.7924	nan	2.8889	3.0979	2.8644	0.8386	0.851	0.8208	0.1508	2.8928
2019070612.0	24.8097	71.7846	-21.0447	nan	2.9772	3.1737	3.1042	0.8929	0.912	0.8748	0.1647	2.9818
2019070613.0	25.2794	71.8631	-32.4021	nan	3.3426	3.8029	2.9796	0.9655	0.9751	1.1049	0.2501	3.352
2019070614.0	25.7522	71.9423	-30.6741	nan	2.8436	3.3846	2.564	1.0061	1.0221	0.9537	0.2705	2.8564
2019070615.0	26.2384	72.0226	-31.9365	nan	3.1408	3.4594	3.4037	1.0392	1.0565	1.0092	0.1912	3.1466
2019070616.0	26.7441	72.1033	-28.0092	nan	2.5586	3.1356	2.5414	1.0704	1.0894	1.0197	0.1853	2.5653
2019070617.0	27.2279	72.1819	-25.0831	nan	2.4504	2.9768	2.5386	1.0692	1.0916	1.0531	0.15	2.455
2019070618.0	27.709	72.2602	-24.694	11.0141	2.4579	2.8808	2.5206	1.0213	1.0392	0.9673	0.1526	2.4627
2019070619.0	28.206	72.3418	-25.1102	10.471	2.6034	3.333	2.8362	1.0106	1.031	0.9645	0.163	2.6085
2019070620.0	28.702	72.4226	-31.1144	10.2126	2.6696	3.4598	2.691	1.0122	1.0462	0.9697	0.1581	2.6743
2019070621.0	29.2006	72.5018	-30.393	9.9703	2.6519	3.1231	3.0132	0.9598	0.9908	0.932	0.1661	2.6571
2019070622.0	29.7041	72.5841	-24.8557	9.9084	2.5175	2.7851	2.4641	0.9421	0.9685	0.9067	0.1544	2.5222
2019070623.0	29.9958	72.6291	nan	9.4585	nan	nan	nan	nan	nan	nan	nan	nan
2019070700.0	29.9995	72.6294	-27.034	9.2992	2.7977	2.9122	3.1515	0.7762	0.8006	0.816	0.1722	2.803
2019070701.0	29.9995	72.6294	-20.1435	9.3482	2.6402	2.947	2.9745	0.7588	0.7766	0.7345	0.1907	2.6471
2019070702.0	30.0041	72.6293	-25.5988	9.2827	2.7994	2.8593	2.4618	0.766	0.7833	0.7462	0.142	2.803
2019070703.0	30.0044	72.6293	-22.7746	8.9385	2.7101	2.8552	2.249	0.7452	0.7671	0.6728	0.1129	2.7125
2019070704.0	30.0054	72.6365	nan	8.8171	nan	nan	nan	nan	nan	nan	nan	nan
2019070705.0	30.0116	72.7657	-22.021	9.4611	1.9761	2.2741	1.9257	0.7046	0.7181	0.743	0.1193	1.9797
2019070706.0	30.0066	72.9361	-14.2276	9.1308	1.4597	1.6397	1.4802	0.6226	0.6308	0.569	0.0633	1.4611
2019070707.0	29.9958	73.1052	-15.468	8.709	1.6731	1.8134	1.8463	0.5976	0.6092	0.5167	0.1219	1.6776
2019070708.0	29.9985	73.2743	-14.3345	8.2114	1.3202	1.3316	1.4136	0.5281	0.5322	0.5355	0.0763	1.3224
2019070709.0	30.0	73.4442	-10.389	7.7449	1.2276	1.4248	1.3868	0.5123	0.5196	0.5308	0.1108	1.2326
2019070710.0	29.996	73.6127	-8.7591	6.6541	1.094	1.1216	1.0228	0.4347	0.4436	0.4152	0.0776	1.0967
2019070711.0	29.9812	73.781	-11.4017	6.2584	0.9398	0.9694	0.9506	0.455	0.4532	0.4352	0.0324	0.9403
2019070712.0	29.9908	73.9478	nan	5.0455	nan	nan	nan	nan	nan	nan	nan	nan
2019070713.0	29.9995	74.1161	-5.2979	4.8855	0.9923	nan	0.7983	nan	nan	0.295	nan	nan
2019070714.0	30.0009	74.2849	nan	4.7021	nan	nan	nan	nan	nan	nan	nan	nan
2019070715.0	29.9998	74.4487	nan	4.4264	nan	nan	nan	nan	nan	nan	nan	nan
2019070716.0	30.0006	74.5003	-9.0992	3.5791	1.1219	1.3927	0.9691	0.2554	0.2599	0.2608	0.0848	1.1251
2019070717.0	30.0007	74.5003	-4.9992	3.3135	0.8323	0.7865	0.9705	0.2315	0.2332	0.2146	0.0187	0.8326
2019070718.0	30.0044	74.4999	-6.1749	2.3886	1.0843	1.149	1.0613	0.2145	0.215	0.1963	0.0868	1.0878
2019070719.0	29.9938	74.4997	-6.3603	2.8263	1.6082	1.6929	1.515	0.2231	0.2257	0.225	0.093	1.6108
2019070720.0	29.9878	74.4996	nan	2.7491	nan	nan	nan	nan	nan	nan	nan	nan
2019070721.0	29.9912	74.4993	-3.0157	1.8397	1.1361	1.4317	1.4691	0.1908	0.1956	0.1807	0.0805	1.1389
2019070722.0	29.9923	74.4993	nan	0.8832	nan	nan	nan	nan	nan	nan	nan	nan
2019070723.0	29.9929	74.4993	nan	0.1917	nan	nan	nan	nan	nan	nan	nan	nan
2019070800.0	29.9929	74.4997	nan	0.2965	nan	nan	nan	nan	nan	nan	nan	nan
2019070801.0	29.9929	74.4997	nan	0.8941	nan	nan	nan	nan	nan	nan	nan	nan
2019070802.0	29.9929	74.4997	nan	1.5202	nan	nan	nan	nan	nan	nan	nan	nan
2019070803.0	29.9929	74.4997	nan	2.0015	nan	nan	nan	nan	nan	nan	nan	nan
2019070804.0	29.9948	74.4912	nan	2.1143	nan	nan	nan	nan	nan	nan	nan	nan
2019070805.0	30.0435	74.484	nan	3.1252	nan	nan	nan	nan	nan	nan	nan	nan
2019070806.0	30.1025	74.4852	nan	2.9232	nan	nan	nan	nan	nan	nan	nan	nan
2019070807.0	30.1184	74.4658	nan	3.4925	nan	nan	nan	nan	nan	nan	nan	nan
2019070808.0	30.1182	74.4657	nan	4.0658	nan	nan	nan	nan	nan	nan	nan	nan
2019070809.0	30.1182	74.4658	nan	5.4403	nan	nan	nan	nan	nan	nan	nan	nan
2019070810.0	30.1181	74.4658	nan	5.4786	nan	nan	nan	nan	nan	nan	nan	nan
2019070811.0	30.118	74.4658	nan	5.2192	nan	nan	nan	nan	nan	nan	nan	nan
2019070812.0	30.1181	74.4659	nan	5.6893	nan	nan	nan	nan	nan	nan	nan	nan
2019070813.0	30.1181	74.4659	nan	6.3585	nan	nan	nan	nan	nan	nan	nan	nan
2019070814.0	30.1182	74.466	nan	6.7564	nan	nan	nan	nan	nan	nan	nan	nan
2019070815.0	30.1183	74.466	nan	7.3645	nan	nan	nan	nan	nan	nan	nan	nan
2019070816.0	30.1183	74.4661	nan	8.473	nan	nan	nan	nan	nan	nan	nan	nan
2019070817.0	30.1183	74.4661	nan	8.1481	nan	nan	nan	nan	nan	nan	nan	nan
2019070818.0	30.1183	74.4661	nan	8.0566	nan	nan	nan	nan	nan	nan	nan	nan
2019070819.0	30.1184	74.4661	nan	8.0455	nan	nan	nan	nan	nan	nan	nan	nan
2019070820.0	30.1185	74.4662	nan	9.0629	nan	nan	nan	nan	nan	nan	nan	nan
2019070821.0	30.1188	74.4662	nan	9.1976	nan	nan	nan	nan	nan	nan	nan	nan
2019070822.0	30.119	74.4662	nan	8.3391	nan	nan	nan	nan	nan	nan	nan	nan
2019070823.0	30.1192	74.4663	nan	7.9545	nan	nan	nan	nan	nan	nan	nan	nan
2019070900.0	30.1194	74.4663	nan	7.5431	nan	nan	nan	nan	nan	nan	nan	nan
2019070901.0	30.1195	74.4663	nan	7.7222	nan	nan	nan	nan	nan	nan	nan	nan
2019070902.0	30.1198	74.4663	nan	7.384	nan	nan	nan	nan	nan	nan	nan	nan
2019070903.0	30.12	74.4663	nan	8.0196	nan	nan	nan	nan	nan	nan	nan	nan
2019070904.0	30.1202	74.4663	nan	8.1046	nan	nan	nan	nan	nan	nan	nan	nan
2019070905.0	30.1168	74.467	nan	8.5768	nan	nan	nan	nan	nan	nan	nan	nan
2019070906.0	30.0062	74.4888	nan	8.2663	nan	nan	nan	nan	nan	nan	nan	nan
2019070907.0	30.0166	74.4931	nan	7.875	nan	nan	nan	nan	nan	nan	nan	nan
2019070908.0	30.0265	74.4939	nan	7.7752	nan	nan	nan	nan	nan	nan	nan	nan
2019070909.0	30.0487	74.4953	nan	7.0619	nan	nan	nan	nan	nan	nan	nan	nan
2019070910.0	30.0715	74.497	nan	6.3967	nan	nan	nan	nan	nan	nan	nan	nan
2019070911.0	30.098	74.4994	nan	5.9876	nan	nan	nan	nan	nan	nan	nan	nan
2019070912.0	30.1153	74.5009	nan	5.9469	nan	nan	nan	nan	nan	nan	nan	nan
2019070913.0	30.1332	74.5019	nan	5.69	nan	nan	nan	nan	nan	nan	nan	nan
2019070914.0	30.1511	74.5032	-1.8624	4.3779	3.1455	3.7947	3.3098	0.5393	0.5573	0.5788	0.1987	3.1517
2019070915.0	30.1737	74.5048	nan	3.4738	nan	nan	nan	nan	nan	nan	nan	nan
2019070916.0	30.196	74.5064	nan	2.7366	nan	nan	nan	nan	nan	nan	nan	nan
2019070917.0	30.2072	74.5245	nan	2.3208	nan	nan	nan	nan	nan	nan	nan	nan
2019070918.0	30.2082	74.6668	nan	2.3291	nan	nan	nan	nan	nan	nan	nan	nan
2019070919.0	30.1992	74.8331	nan	0.8567	nan	nan	nan	nan	nan	nan	nan	nan
2019070920.0	30.1847	75.0037	nan	1.5977	nan	nan	nan	nan	nan	nan	nan	nan
2019070921.0	30.1637	75.1721	nan	2.7644	nan	nan	nan	nan	nan	nan	nan	nan
2019070922.0	30.1486	75.3421	-0.5077	3.1901	1.003	1.3711	1.0264	0.2566	0.2682	0.2437	0.0951	1.0075
2019071000.0	30.1271	75.6816	nan	6.4344	nan	nan	nan	nan	nan	nan	nan	nan
2019071001.0	30.1172	75.8506	nan	6.1004	nan	nan	nan	nan	nan	nan	nan	nan
2019071002.0	30.1079	76.0189	nan	6.2823	nan	nan	nan	nan	nan	nan	nan	nan
2019071003.0	30.0864	76.1867	nan	5.0895	nan	nan	nan	nan	nan	nan	nan	nan
2019071004.0	30.0603	76.3547	nan	4.9703	nan	nan	nan	nan	nan	nan	nan	nan
2019071005.0	30.046	76.5244	-9.0257	6.7239	2.1983	2.5449	1.9653	0.7533	0.7618	0.8247	0.2651	2.2142
2019071006.0	30.0297	76.6895	nan	6.2055	nan	nan	nan	nan	nan	nan	nan	nan
2019071007.0	30.0163	76.8514	-4.3949	4.7394	1.2803	1.235	1.2176	0.4229	0.429	0.4492	0.1085	1.2848
2019071008.0	30.0705	77.0079	-14.0233	3.5716	3.5316	2.1219	3.4261	0.325	0.3341	0.3723	0.1342	3.5341
2019071009.0	30.1571	77.1597	-6.9906	3.1824	1.0974	2.6703	1.144	0.1692	0.1719	0.1866	0.0866	1.1008
2019071010.0	30.1744	77.3136	nan	3.0352	nan	nan	nan	nan	nan	nan	nan	nan
2019071011.0	30.1532	77.4722	-0.6575	2.8946	1.1191	1.5362	1.3344	0.1467	0.1504	0.1455	0.1331	1.1269
2019071012.0	30.1116	77.6321	0.0248	3.3274	0.495	0.7652	0.3688	0.1209	0.1228	0.1071	0.0374	0.4964
2019071013.0	30.0799	77.7963	-0.5352	3.0547	0.9252	1.4871	0.9439	0.1463	0.1511	0.1298	0.0855	0.9291
2019071014.0	30.0522	77.9604	-0.532	2.8164	0.675	0.9992	0.7367	0.1205	0.123	0.1185	0.066	0.6782
2019071015.0	30.0176	78.1258	1.7421	2.3789	0.9108	0.7686	1.0409	0.1154	0.1171	0.1193	0.0409	0.9117
2019071016.0	30.0006	78.2438	nan	1.601	nan	nan	nan	nan	nan	nan	nan	nan
2019071017.0	29.9996	78.254	-2.013	2.1071	1.3268	2.0316	1.2212	0.2781	0.2739	0.2283	0.0879	1.3297
2019071018.0	29.9985	78.2532	-4.1213	2.99	1.9984	2.8523	2.1784	0.4308	0.4339	0.4516	0.1141	2.0017
2019071019.0	30.0013	78.2496	nan	2.277	nan	nan	nan	nan	nan	nan	nan	nan
2019071020.0	29.9941	78.2554	-1.9242	3.0427	1.2926	1.7181	0.9244	0.1875	0.1892	0.212	0.2503	1.3166
2019071021.0	29.9951	78.2549	-0.5357	2.6461	0.693	0.5502	0.4965	0.1442	0.1444	0.1293	0.0475	0.6946
2019071022.0	29.9951	78.2549	nan	0.9459	nan	nan	nan	nan	nan	nan	nan	nan
2019071023.0	29.9957	78.2549	-1.6606	1.048	1.8671	1.8276	2.2558	0.2141	0.2157	0.2193	0.1179	1.8709
2019071100.0	29.9973	78.2552	3.1806	1.0009	1.685	2.0219	1.4305	0.2341	0.2339	0.2185	0.1291	1.69
2019071101.0	29.9973	78.2553	-3.3917	1.8906	1.4509	1.7005	1.1478	0.2474	0.2495	0.218	0.0923	1.4538
2019071102.0	29.9994	78.2553	-1.5476	2.7138	1.4826	1.4491	1.5285	0.2611	0.2621	0.238	0.0898	1.4853
2019071103.0	30.0292	78.2507	nan	2.5812	nan	nan	nan	nan	nan	nan	nan	nan
2019071104.0	30.1054	78.2497	nan	3.0767	nan	nan	nan	nan	nan	nan	nan	nan
2019071105.0	30.1865	78.2532	nan	2.7835	nan	nan	nan	nan	nan	nan	nan	nan
2019071106.0	30.2025	78.2615	-1.0521	2.8934	1.9989	2.5612	2.3451	0.3445	0.3497	0.3214	0.1169	2.0023
2019071107.0	30.2021	78.2614	-6.6758	2.5687	2.3458	2.2087	1.7504	0.3373	0.3364	0.332	0.0724	2.3469
2019071108.0	30.2019	78.2614	-2.2045	3.0004	2.4092	2.8647	2.1051	0.3702	0.3749	0.3176	0.1422	2.4134
2019071109.0	30.2016	78.2614	-1.9367	3.0066	1.693	1.6935	1.7435	0.3445	0.3475	0.2939	0.0762	1.6947
2019071110.0	30.2013	78.2613	-2.3774	2.746	1.6759	2.3355	2.527	0.356	0.3594	0.312	0.1466	1.6823
2019071111.0	30.2011	78.2613	-4.8183	3.2584	1.815	2.0611	1.9934	0.3323	0.332	0.3287	0.0989	1.8177
2019071112.0	30.2007	78.2613	-4.1282	3.4357	1.4304	1.6406	1.4217	0.3374	0.3332	0.2701	0.0841	1.4329
2019071113.0	30.2003	78.2612	-5.9743	3.2869	2.3695	2.6456	2.7764	0.3605	0.362	0.299	0.1498	2.3742
2019071114.0	30.1999	78.2611	-7.3452	3.0255	1.6988	2.2046	1.5772	0.3411	0.3412	0.317	0.0603	1.6999
2019071115.0	30.1996	78.2611	-3.0128	2.314	1.891	2.081	1.9389	0.3429	0.3443	0.3194	0.0462	1.8916
2019071116.0	30.1994	78.2611	-3.5148	1.3742	1.763	1.7182	1.6739	0.2415	0.2438	0.2182	0.0994	1.7658
2019071117.0	30.1991	78.261	nan	1.1136	nan	nan	nan	nan	nan	nan	nan	nan
2019071118.0	30.1984	78.2609	nan	1.3302	nan	nan	nan	nan	nan	nan	nan	nan
2019071119.0	30.1725	78.2588	nan	2.1345	nan	nan	nan	nan	nan	nan	nan	nan
2019071120.0	30.0225	78.2735	nan	2.2799	nan	nan	nan	nan	nan	nan	nan	nan
2019071121.0	30.0149	78.2703	2.3388	2.5684	1.767	2.0307	1.7344	0.2918	0.2897	0.2893	0.1031	1.77
2019071122.0	30.0069	78.2669	3.2427	1.5227	2.4314	2.204	1.9223	0.2917	0.2956	0.2338	0.095	2.4333
2019071123.0	30.018	78.2654	0.1231	2.4943	2.6227	3.8783	2.2092	0.3673	0.3742	0.3396	0.3282	2.6431
2019071200.0	30.0098	78.2618	-4.7767	2.5805	3.3217	3.8998	2.1381	0.3707	0.3874	0.3901	0.3101	3.3362
2019071201.0	30.007	78.2588	-3.9561	2.5301	1.8805	3.0584	2.012	0.3373	0.3486	0.3381	0.2015	1.8913
2019071202.0	30.0158	78.2572	-1.2485	2.5458	3.0465	4.0609	4.3679	0.3594	0.3768	0.3758	0.3947	3.072
2019071203.0	30.0011	78.2537	nan	2.7354	nan	nan	nan	nan	nan	nan	nan	nan
2019071204.0	29.981	78.2334	nan	3.372	nan	nan	nan	nan	nan	nan	nan	nan
2019071205.0	29.985	78.114	-4.6993	3.5493	1.4248	2.0398	1.7988	0.3466	0.3656	0.3611	0.1816	1.4363
2019071206.0	30.0255	77.981	-8.6025	4.2236	1.2558	1.7077	1.2666	0.279	0.2951	0.315	0.1385	1.2634
2019071207.0	30.0451	77.848	-8.832	4.4273	0.9806	1.3171	0.8468	0.2576	0.2725	0.2764	0.1219	0.9882
2019071208.0	30.0645	77.7153	-3.7958	4.2051	1.5662	1.9873	1.4911	0.275	0.2865	0.3666	0.1803	1.5765
2019071209.0	30.0379	77.6118	-4.1586	3.7476	1.1768	3.0339	1.2358	0.2436	0.2566	0.2661	0.242	1.2014
2019071210.0	29.9502	77.4907	-4.8717	4.2413	1.2226	1.7579	1.4638	0.2683	0.2815	0.4012	0.2373	1.2454
2019071211.0	30.0383	77.3512	-7.1622	4.1485	1.6173	1.5858	1.411	0.2717	0.2843	0.2975	0.0845	1.6195
2019071212.0	30.1343	77.2114	-8.1837	4.1531	1.2971	1.203	1.1935	0.306	0.3211	0.2805	0.0709	1.299
2019071213.0	30.2126	77.0702	-7.2771	3.8691	1.1085	1.1992	1.1323	0.2959	0.3063	0.291	0.0469	1.1095
2019071214.0	30.2777	76.9282	-3.5682	3.3607	1.429	1.6737	1.7231	0.3489	0.3583	0.3558	0.1108	1.4333
2019071215.0	30.3494	76.786	-6.6695	3.7641	2.235	2.7489	1.9701	0.3996	0.4125	0.4116	0.1581	2.2406
2019071216.0	30.4454	76.6397	-4.1461	4.2437	2.0078	2.3207	2.1972	0.3756	0.3836	0.4073	0.131	2.012
2019071217.0	30.5052	76.5129	nan	3.5566	nan	nan	nan	nan	nan	nan	nan	nan
2019071218.0	30.5002	76.4959	-6.8359	3.1154	2.1456	2.5154	2.2445	0.3989	0.4008	0.3082	0.0664	2.1467
2019071219.0	30.4971	76.4965	-5.265	1.9567	1.726	1.9725	1.9884	0.26	0.2606	0.2374	0.1349	1.7313
2019071220.0	30.5046	76.4985	nan	2.3394	nan	nan	nan	nan	nan	nan	nan	nan
2019071221.0	30.5015	76.5024	nan	3.8199	nan	nan	nan	nan	nan	nan	nan	nan
2019071222.0	30.5038	76.5056	nan	4.393	nan	nan	nan	nan	nan	nan	nan	nan
2019071223.0	30.5016	76.5066	-15.4592	4.7817	2.2976	1.7338	1.0946	0.2799	0.2853	0.3321	0.1737	2.3042
2019071300.0	30.5015	76.5066	-11.6135	4.4632	1.5524	1.8811	1.6781	0.3076	0.3115	0.286	0.1658	1.5612
2019071301.0	30.5015	76.5066	-9.0006	4.1493	1.5386	1.9626	1.9872	0.3042	0.3057	0.305	0.1378	1.5447
2019071302.0	30.5016	76.5066	-13.7638	5.4709	2.3467	2.3139	2.664	0.3809	0.3872	0.4274	0.1846	2.354
2019071303.0	30.502	76.5069	-7.7977	4.4346	1.1613	2.1134	1.4775	0.2621	0.2696	0.249	0.2123	1.1805
2019071304.0	30.5039	76.5069	-9.3379	4.2209	1.4696	1.6193	1.2886	0.2451	0.2485	0.236	0.1102	1.4737
2019071305.0	30.5041	76.507	-5.5962	3.9852	0.7903	1.0796	0.7332	0.2031	0.2098	0.1968	0.0482	0.7917
2019071306.0	30.5305	76.5272	nan	2.9992	nan	nan	nan	nan	nan	nan	nan	nan
2019071307.0	30.5745	76.5277	nan	2.4743	nan	nan	nan	nan	nan	nan	nan	nan
2019071308.0	30.6135	76.5313	nan	2.4705	nan	nan	nan	nan	nan	nan	nan	nan
2019071309.0	30.6198	76.5529	11.0408	3.0423	2.0893	2.4097	1.9324	0.2962	0.3027	0.3142	0.2389	2.1029
2019071310.0	30.6195	76.5527	-2.9029	3.0234	0.8897	1.1353	0.7003	0.2326	0.2335	0.2498	0.0468	0.8909
2019071311.0	30.6191	76.5525	-3.8106	2.7362	1.9161	2.2919	2.0262	0.1829	0.1852	0.1892	0.2556	1.933
2019071312.0	30.6187	76.5524	-0.7906	2.6324	0.6491	0.6695	0.7247	0.1333	0.1341	0.1233	0.0357	0.6501
2019071313.0	30.6183	76.5523	-3.4972	2.6169	1.7339	1.7544	3.107	0.2125	0.2132	0.2177	0.1687	1.742
2019071314.0	30.6181	76.5523	-2.1602	2.7352	1.7675	2.2971	2.4184	0.2015	0.2014	0.2164	0.3008	1.7929
2019071315.0	30.618	76.5522	-0.7583	2.7173	1.143	1.0431	0.972	0.1918	0.1912	0.17	0.1163	1.1489
2019071316.0	30.6178	76.552	nan	2.4986	nan	nan	nan	nan	nan	nan	nan	nan
2019071317.0	30.6174	76.5519	nan	2.3312	nan	nan	nan	nan	nan	nan	nan	nan
2019071318.0	30.6173	76.5518	nan	2.6358	nan	nan	nan	nan	nan	nan	nan	nan
2019071319.0	30.617	76.5517	nan	2.1689	nan	nan	nan	nan	nan	nan	nan	nan
2019071320.0	30.6167	76.5516	nan	2.037	nan	nan	nan	nan	nan	nan	nan	nan
2019071321.0	30.6163	76.5515	nan	1.6694	nan	nan	nan	nan	nan	nan	nan	nan
2019071322.0	30.6009	76.5457	nan	2.2269	nan	nan	nan	nan	nan	nan	nan	nan
2019071323.0	30.4824	76.5025	nan	1.9489	nan	nan	nan	nan	nan	nan	nan	nan
2019071400.0	30.4886	76.5056	1.8142	1.6008	5.839	6.2803	5.0816	0.2123	0.2132	0.4375	0.8685	5.9033
2019071401.0	30.5006	76.5105	-2.4224	1.6983	1.9987	2.7046	1.489	0.2701	0.2707	0.288	0.2643	2.0161
2019071402.0	30.5012	76.5107	-1.5452	2.5676	1.4854	2.0083	1.475	0.276	0.2778	0.2334	0.1163	1.4899
2019071403.0	30.5062	76.5138	-1.5444	2.3785	1.3593	2.0514	1.4484	0.2462	0.2468	0.2218	0.177	1.3708
2019071404.0	30.5158	76.5198	0.7596	2.4531	2.0111	2.5175	2.1418	0.1997	0.2025	0.2513	0.2351	2.0248
2019071405.0	30.5254	76.5262	1.6089	2.3187	3.1085	3.1947	3.2355	0.1524	0.1544	0.2676	0.5075	3.1497
2019071406.0	30.5348	76.5323	-2.0036	2.7048	1.0924	1.3082	0.9799	0.1756	0.1773	0.1635	0.1094	1.0979
2019071407.0	30.5441	76.5384	-2.6779	3.4279	0.6642	0.7275	0.5581	0.2001	0.2009	0.1887	0.0486	0.6659
2019071408.0	30.5529	76.5441	-3.6322	3.6896	0.9908	1.2392	0.7921	0.2256	0.2273	0.2357	0.1043	0.9963
2019071409.0	30.5596	76.5491	-3.2826	4.4226	1.0085	1.209	1.2511	0.258	0.2557	0.2608	0.0937	1.0128
2019071410.0	30.5634	76.5556	-5.2613	3.7377	0.9422	0.9266	1.0685	0.223	0.2229	0.2235	0.0661	0.9445
2019071411.0	30.602	76.6153	nan	3.8695	nan	nan	nan	nan	nan	nan	nan	nan
2019071412.0	30.7143	76.7727	-6.0899	2.6912	1.2368	1.6285	0.9746	0.2163	0.217	0.1983	0.1627	1.2475
2019071413.0	30.8257	76.9318	-0.2872	2.51	1.2431	nan	1.825	nan	nan	0.1896	nan	nan
2019071414.0	30.9285	77.0918	-1.9263	2.4666	0.8276	1.0937	0.7811	0.1984	0.1986	0.1705	0.078	0.8312
2019071415.0	31.044	77.2559	-2.0013	1.8755	1.2555	1.1337	1.533	0.2007	0.2042	0.212	0.0627	1.2571
2019071416.0	31.156	77.4184	0.2028	1.3766	1.3293	1.7221	1.3409	0.1698	0.174	0.1848	0.1767	1.341
2019071417.0	31.275	77.5733	-12.8856	0.9229	3.3914	4.4232	2.7281	0.217	0.231	0.3457	0.4715	3.424
2019071418.0	31.4029	77.7352	1.3605	0.8129	1.1897	1.2893	1.1409	0.1141	0.1215	0.1407	0.1247	1.1962
2019071419.0	31.5526	77.8871	-0.5737	1.0453	0.529	0.6538	0.6228	0.1094	0.1166	0.1153	0.0445	0.5309
2019071420.0	31.7671	78.0179	0.286	0.694	0.6376	1.0456	0.7134	0.1115	0.1151	0.0985	0.0705	0.6414
2019071421.0	31.9898	78.1393	0.6031	0.8974	0.6905	0.7607	0.5496	0.1257	0.1268	0.1176	0.0634	0.6934
2019071422.0	32.1019	78.2683	-4.6108	3.8362	0.6502	1.3322	0.5661	0.1955	0.2073	0.1674	0.0726	0.6542
2019071423.0	32.24	78.4217	-5.7357	4.1221	0.6891	0.8769	0.6504	0.2417	0.2573	0.2159	0.051	0.691
2019071500.0	32.3817	78.5651	-5.4443	4.1222	1.0031	1.139	1.0884	0.306	0.3142	0.2965	0.0798	1.0063
2019071501.0	32.5217	78.7172	-8.5579	3.5402	2.0139	2.2379	1.7923	0.4167	0.4192	0.368	0.1432	2.019
2019071502.0	32.5098	78.8614	-4.2049	3.242	2.2387	2.3283	2.0953	0.4197	0.4192	0.4576	0.1136	2.2416
2019071503.0	32.4679	78.9931	-4.1951	2.6222	2.041	2.386	1.9514	0.3669	0.369	0.3875	0.2448	2.0557
2019071504.0	32.174	79.1124	-3.8378	3.1006	1.4334	1.8037	1.1033	0.3255	0.3458	0.321	0.1849	1.4452
2019071505.0	31.8287	79.1963	-9.6818	2.6022	2.0655	2.0188	2.2413	0.3164	0.333	0.3032	0.1046	2.0681
2019071506.0	31.6728	79.2329	nan	3.1637	nan	nan	nan	nan	nan	nan	nan	nan
2019071507.0	31.6011	79.2483	nan	2.7165	nan	nan	nan	nan	nan	nan	nan	nan
2019071508.0	31.5888	79.2565	nan	2.4463	nan	nan	nan	nan	nan	nan	nan	nan
2019071509.0	31.556	79.2897	nan	nan	nan	nan	nan	nan	nan	nan	nan	nan
2019071510.0	31.4392	79.3313	2.5086	nan	2.3149	3.0359	2.0956	0.2848	0.2992	0.3248	0.2551	2.3289
2019071511.0	31.3429	79.3778	-1.8672	nan	1.6486	1.8232	2.0343	0.2758	0.2944	0.252	0.1167	1.6527
2019071512.0	31.2595	79.4233	0.3683	nan	1.1463	1.909	1.4097	0.3158	0.3261	0.3113	0.1496	1.156
2019071513.0	31.1728	79.4715	nan	nan	nan	nan	nan	nan	nan	nan	nan	nan
2019071514.0	31.036	79.5133	nan	nan	nan	nan	nan	nan	nan	nan	nan	nan
2019071515.0	30.9036	79.56	0.5604	nan	1.4203	1.2642	1.6029	0.2763	0.281	0.2526	0.1098	1.4245
2019071516.0	30.7802	79.6076	nan	nan	nan	nan	nan	nan	nan	nan	nan	nan
2019071517.0	30.6753	79.6544	nan	nan	nan	nan	nan	nan	nan	nan	nan	nan
2019071518.0	30.5775	79.7123	nan	nan	nan	nan	nan	nan	nan	nan	nan	nan
2019071519.0	30.4701	79.7588	-0.4766	nan	1.1763	1.1954	1.2812	0.3136	0.3149	0.2945	0.0789	1.179
2019071520.0	30.382	79.8057	-2.8955	nan	2.6063	2.864	2.6555	0.3847	0.3873	0.4375	0.3284	2.6269
2019071521.0	30.3346	79.8595	nan	nan	nan	nan	nan	nan	nan	nan	nan	nan
2019071522.0	30.2678	79.9105	nan	nan	nan	nan	nan	nan	nan	nan	nan	nan
2019071523.0	30.2321	79.9524	-0.0737	nan	1.1107	1.273	0.9724	0.2652	0.2635	0.2511	0.0713	1.113
2019071600.0	30.1707	79.981	nan	nan	nan	nan	nan	nan	nan	nan	nan	nan
2019071601.0	30.1129	80.0125	nan	nan	nan	nan	nan	nan	nan	nan	nan	nan
2019071602.0	30.0567	80.0394	-6.3284	nan	2.3064	2.8927	1.9419	0.2329	0.2326	0.2543	0.2487	2.3197
2019071603.0	30.0236	80.0459	-1.7186	nan	1.398	1.2334	1.1663	0.2156	0.2137	0.1749	0.1167	1.4028
2019071604.0	30.0081	80.0393	0.5861	nan	1.2614	1.3031	0.9744	0.2595	0.2631	0.2294	0.0816	1.264
2019071605.0	29.9883	80.0358	0.0415	nan	1.3022	1.4806	1.4436	0.25	0.252	0.203	0.0561	1.3034
2019071606.0	29.9683	80.0367	0.9158	nan	1.1891	1.5464	1.4008	0.2511	0.2496	0.2243	0.0898	1.1924
2019071607.0	29.9529	80.0416	nan	nan	nan	nan	nan	nan	nan	nan	nan	nan
2019071608.0	29.9511	80.0483	nan	nan	nan	nan	nan	nan	nan	nan	nan	nan
2019071609.0	29.9461	80.055	nan	nan	nan	nan	nan	nan	nan	nan	nan	nan
2019071610.0	29.9435	80.0607	nan	nan	nan	nan	nan	nan	nan	nan	nan	nan
2019071611.0	29.9225	80.0717	-0.4138	nan	1.2142	1.6017	1.1612	0.1878	0.1955	0.1894	0.0987	1.2182
2019071612.0	29.9285	80.0747	nan	nan	nan	nan	nan	nan	nan	nan	nan	nan
2019071613.0	29.9395	80.0721	nan	nan	nan	nan	nan	nan	nan	nan	nan	nan
2019071614.0	29.9448	80.0672	nan	nan	nan	nan	nan	nan	nan	nan	nan	nan
2019071615.0	29.9442	80.0616	-0.3147	nan	1.0431	1.1775	1.0075	0.2274	0.2251	0.1972	0.0515	1.0444
2019071616.0	29.9396	80.057	2.5058	nan	1.9227	2.4882	2.5711	0.3039	0.3048	0.2483	0.248	1.9386
2019071617.0	29.9331	80.0551	-4.3358	nan	3.0124	3.0997	3.7038	0.4482	0.4504	0.4512	0.2792	3.0253
2019071618.0	29.9274	80.0577	3.3446	nan	1.2884	1.3056	1.2715	0.2669	0.2646	0.2223	0.0578	1.2897
2019071619.0	29.9229	80.0641	-0.3441	nan	1.8618	2.518	2.1349	0.3803	0.3809	0.372	0.2334	1.8763
2019071620.0	29.9293	80.0747	nan	nan	nan	nan	nan	nan	nan	nan	nan	nan
2019071621.0	29.9461	80.0862	nan	nan	nan	nan	nan	nan	nan	nan	nan	nan
2019071622.0	29.9731	80.097	nan	nan	nan	nan	nan	nan	nan	nan	nan	nan
2019071623.0	30.0116	80.1048	nan	nan	nan	nan	nan	nan	nan	nan	nan	nan
2019071700.0	30.0538	80.1076	nan	nan	nan	nan	nan	nan	nan	nan	nan	nan
2019071701.0	30.0917	80.1058	nan	nan	nan	nan	nan	nan	nan	nan	nan	nan
2019071702.0	30.1225	80.1008	nan	nan	nan	nan	nan	nan	nan	nan	nan	nan
2019071703.0	30.1423	80.0942	nan	nan	nan	nan	nan	nan	nan	nan	nan	nan
2019071705.0	30.1515	80.0851	nan	nan	nan	nan	nan	nan	nan	nan	nan	nan
2019071706.0	30.1503	80.0857	nan	nan	nan	nan	nan	nan	nan	nan	nan	nan
2019071707.0	30.1512	80.0908	nan	nan	nan	nan	nan	nan	nan	nan	nan	nan
2019071708.0	30.1566	80.0997	nan	nan	nan	nan	nan	nan	nan	nan	nan	nan
2019071709.0	30.1644	80.1118	nan	nan	nan	nan	nan	nan	nan	nan	nan	nan
2019071710.0	30.191	80.1154	nan	nan	nan	nan	nan	nan	nan	nan	nan	nan
2019071711.0	30.1904	80.0895	nan	nan	nan	nan	nan	nan	nan	nan	nan	nan
2019071712.0	30.2512	80.0682	nan	nan	nan	nan	nan	nan	nan	nan	nan	nan
2019071713.0	30.2372	80.0406	nan	nan	nan	nan	nan	nan	nan	nan	nan	nan
2019071714.0	30.269	80.0216	nan	nan	nan	nan	nan	nan	nan	nan	nan	nan
2019071715.0	30.3563	79.9886	nan	nan	nan	nan	nan	nan	nan	nan	nan	nan
2019071716.0	30.4156	79.9528	nan	nan	nan	nan	nan	nan	nan	nan	nan	nan
2019071717.0	30.5247	79.9207	nan	nan	nan	nan	nan	nan	nan	nan	nan	nan
2019071718.0	30.6582	79.878	nan	nan	nan	nan	nan	nan	nan	nan	nan	nan
2019071719.0	30.7089	79.8376	nan	nan	nan	nan	nan	nan	nan	nan	nan	nan
2019071720.0	30.734	79.803	nan	nan	nan	nan	nan	nan	nan	nan	nan	nan
2019071721.0	30.7459	79.7692	-2.8455	nan	3.0036	3.7875	2.421	0.9508	0.9733	0.7671	0.1904	3.0096
2019071722.0	30.84	79.738	-10.2467	nan	5.5538	6.8608	5.9833	1.2835	1.3035	1.1004	0.4801	5.5746
2019071723.0	30.942	79.704	nan	nan	nan	nan	nan	nan	nan	nan	nan	nan
2019071800.0	31.1244	79.6876	-16.9992	nan	2.9778	3.5185	2.6346	0.9255	0.9467	0.8318	0.2052	2.9848
2019071801.0	31.4753	79.6663	nan	nan	nan	nan	nan	nan	nan	nan	nan	nan
2019071802.0	31.5778	79.6168	nan	nan	nan	nan	nan	nan	nan	nan	nan	nan
2019071803.0	31.6135	79.5642	nan	nan	nan	nan	nan	nan	nan	nan	nan	nan
2019071804.0	31.6459	79.5101	nan	nan	nan	nan	nan	nan	nan	nan	nan	nan
2019071805.0	31.682	79.4743	nan	nan	nan	nan	nan	nan	nan	nan	nan	nan
2019071806.0	31.6467	79.4275	nan	nan	nan	nan	nan	nan	nan	nan	nan	nan
2019071807.0	31.5876	79.3715	nan	nan	nan	nan	nan	nan	nan	nan	nan	nan
2019071808.0	31.7063	79.3235	-17.7271	nan	3.5593	6.7791	3.6256	0.56	0.5848	0.6261	0.4968	3.5938
2019071809.0	31.8601	79.2821	nan	nan	nan	nan	nan	nan	nan	nan	nan	nan
2019071810.0	32.1097	79.2431	nan	nan	nan	nan	nan	nan	nan	nan	nan	nan
2019071811.0	32.3056	79.0724	-10.3091	nan	1.131	1.2912	1.2806	0.2698	0.2845	0.2653	0.06	1.1326
2019071812.0	32.6384	78.8692	-20.2798	nan	1.8016	2.3977	1.9223	0.4319	0.4626	0.5618	0.2963	1.8258
2019071813.0	32.9285	78.6782	nan	nan	nan	nan	nan	nan	nan	nan	nan	nan
2019071814.0	32.7751	78.481	-44.4158	nan	2.8181	3.2778	3.0774	0.8443	0.8819	0.88	0.1501	2.8221
2019071815.0	32.5303	78.2808	-45.1342	11.0448	3.1528	3.442	2.963	0.9159	0.9454	1.025	0.2932	3.1664
2019071816.0	32.2841	78.0799	-44.1435	10.1219	2.618	3.2626	2.7414	0.8488	0.8804	0.9689	0.2861	2.6335
2019071817.0	32.0381	77.8766	-30.396	8.9901	1.7675	2.09	1.7569	0.7419	0.7619	0.7367	0.1367	1.7728
2019071818.0	31.8013	77.675	-48.5571	10.5883	3.8476	3.5232	3.4064	0.9048	0.9411	1.0936	0.235	3.8548
2019071819.0	31.6031	77.4991	-44.648	11.1507	3.2131	nan	3.7843	nan	nan	1.1078	nan	nan
2019071820.0	31.3877	77.3089	-30.2816	10.3259	2.2963	2.4839	2.2217	0.8356	0.8715	0.8967	0.0537	2.297
2019071821.0	31.1752	77.1142	-30.3116	10.1558	2.4204	2.5946	2.7659	0.8031	0.8445	0.8861	0.2489	2.4331
2019071822.0	30.9848	76.923	-38.8254	11.6023	2.8799	3.4192	3.2765	0.9552	1.0075	1.1251	0.3934	2.9066
2019071823.0	30.7789	76.7295	-28.1579	10.9536	3.1147	3.9409	3.0076	0.8266	0.8797	1.1397	0.5428	3.1617
2019071900.0	30.5634	76.5411	nan	10.6873	nan	nan	nan	nan	nan	nan	nan	nan
2019071901.0	29.9602	76.4654	-28.4387	10.8404	3.8107	9.4732	4.0966	0.8721	0.9028	0.9497	1.0327	3.9482
2019071902.0	29.1394	76.4163	-25.3823	9.7559	2.8232	2.6057	2.4065	0.6808	0.7047	0.7374	0.1898	2.8296
2019071903.0	28.3213	76.3667	-16.8668	7.8532	1.4048	1.8007	1.1957	0.5533	0.5718	0.6205	0.1294	1.4107
2019071904.0	27.4717	76.3157	-16.4769	6.2663	1.7266	1.7215	1.4689	0.4044	0.4198	0.487	0.2702	1.7476
2019071905.0	26.6031	76.2629	-10.6569	5.5387	0.9564	0.8781	1.0437	0.3159	0.3275	0.3515	0.0704	0.959
2019071906.0	25.7261	76.2026	-5.4756	4.3993	1.1695	1.0821	1.3581	0.2802	0.2931	0.2799	0.1105	1.1747
2019071907.0	24.8127	76.1603	-4.4095	3.6878	0.9979	2.2381	1.4193	0.1542	0.1729	0.1956	0.1731	1.0128
2019071908.0	23.9806	76.1625	3.8208	2.7424	2.6821	2.6814	3.3081	0.0924	0.1066	0.1369	0.3929	2.7107
2019071909.0	23.1768	76.1684	-1.9271	2.5837	1.7122	nan	1.5328	0.1541	0.1758	0.1608	nan	nan
2019071910.0	22.4445	76.1465	-4.0944	4.238	0.781	1.3059	0.8399	0.1275	0.141	0.16	0.1478	0.7949
2019071911.0	21.6507	76.1471	-3.6014	2.8406	0.9238	0.7725	0.6148	0.0994	0.1086	0.0946	0.0757	0.9269
2019071912.0	20.8123	76.1487	-5.1607	3.1736	0.8243	0.8959	0.8095	0.2019	0.2192	0.2089	0.0883	0.829
2019071913.0	19.9738	76.1458	nan	3.5786	nan	nan	nan	nan	nan	nan	nan	nan
2019071914.0	19.1584	76.1509	-10.9573	4.0343	1.3227	1.6965	1.4422	0.2506	0.2823	0.2406	0.1066	1.327
2019071915.0	18.344	76.1592	-5.6224	4.8814	0.9239	0.9052	0.9399	0.1901	0.2132	0.2105	0.0384	0.9247
2019071916.0	17.5386	76.1662	-4.2437	3.0163	0.6292	0.8592	0.6872	0.1519	0.1754	0.162	0.0374	0.6303
2019071917.0	16.7914	76.1906	-1.9058	2.9146	0.4616	0.5044	0.4975	0.1167	0.1344	0.118	0.0344	0.4629
2019071918.0	16.1095	76.2707	-5.8582	3.004	2.2047	3.1865	2.2552	0.1178	0.1366	0.168	0.4398	2.2481
2019071919.0	15.579	76.3984	-1.8246	2.3654	0.4886	0.3937	0.5385	0.0989	0.1124	0.1055	0.0336	0.4898
2019071920.0	15.1012	76.5496	-1.492	3.1433	0.9146	0.9006	0.9964	0.0978	0.1078	0.1293	0.1038	0.9205
2019071921.0	14.6643	76.7008	-4.4355	3.0067	0.9265	1.7267	1.3719	0.1146	0.131	0.1328	0.1666	0.9413
2019071922.0	14.2029	76.8481	-4.4094	4.2076	1.0496	0.7993	1.4032	0.1489	0.1655	0.1291	0.0967	1.0541
2019071923.0	13.7674	76.9941	nan	4.6144	nan	nan	nan	nan	nan	nan	nan	nan
2019072000.0	13.32	77.1347	nan	5.552	nan	nan	nan	nan	nan	nan	nan	nan
2019072001.0	12.8672	77.2758	nan	6.3104	nan	nan	nan	nan	nan	nan	nan	nan
2019072002.0	12.6133	77.4369	-19.6987	6.8841	2.0635	2.3664	1.5304	0.3221	0.3528	0.3597	0.2636	2.0803
2019072003.0	12.5676	77.6226	-21.4389	7.3325	2.6874	2.6893	2.9083	0.4234	0.4698	0.4277	0.1651	2.6925
2019072004.0	12.5257	77.8045	-9.6107	6.7121	1.1976	1.5497	1.3818	0.2956	0.3243	0.3371	0.1146	1.203
2019072005.0	12.58	77.9729	nan	nan	nan	nan	nan	nan	nan	nan	nan	nan
2019072006.0	13.2463	78.0781	-3.1243	nan	1.2267	0.8593	1.2646	0.2138	0.2441	0.237	0.0591	1.2282
2019072007.0	14.0676	78.1714	-0.9171	nan	0.541	0.7815	0.4855	0.094	0.1118	0.1037	0.0152	0.5412
2019072008.0	14.933	78.2435	-3.2451	nan	1.4283	1.1028	1.4597	0.1229	0.139	0.1444	0.1451	1.4357
2019072009.0	15.4045	78.2608	nan	nan	nan	nan	nan	nan	nan	nan	nan	nan
2019072010.0	14.5713	78.2145	-3.0476	nan	1.0202	0.9851	0.8589	0.2123	0.2091	0.2223	0.0933	1.0245
2019072011.0	13.6349	78.1399	-9.7379	nan	1.6222	1.7926	1.849	0.2095	0.2113	0.2656	0.1937	1.6337
2019072012.0	12.6625	78.0887	-7.0113	nan	2.3848	3.0033	3.259	0.4142	0.4226	0.469	0.5307	2.4432
2019072013.0	11.702	78.0337	-5.8909	nan	1.6609	2.2789	1.8873	0.3565	0.3646	0.3522	0.2123	1.6745
2019072014.0	10.8802	78.0592	nan	nan	nan	nan	nan	nan	nan	nan	nan	nan
2019072015.0	10.3805	78.2387	-4.1921	nan	1.4549	1.6522	1.4775	0.3098	0.3146	0.3052	0.111	1.4591
2019072016.0	9.9032	78.4222	-6.4091	nan	1.3208	1.5363	1.4619	0.3309	0.345	0.3483	0.0994	1.3246
2019072017.0	9.4122	78.6057	-9.0556	3.6371	1.406	1.3569	1.4362	0.3106	0.3253	0.3412	0.076	1.408
2019072018.0	9.1842	78.8032	-9.5467	3.64	2.0958	1.6756	1.985	0.3294	0.344	0.319	0.1704	2.1027
2019072019.0	9.2248	79.0135	-6.0944	4.116	0.9887	1.3095	1.074	0.2741	0.2902	0.2677	0.1151	0.9953
2019072020.0	9.2635	79.2192	-6.6347	3.6361	0.7927	0.8817	0.9219	0.3101	0.3156	0.2948	0.0219	0.793
2019072021.0	9.2977	79.4131	-6.0504	3.9177	0.8292	0.8225	0.9134	0.2341	0.2425	0.228	0.053	0.8309
2019072022.0	9.3394	79.6062	-10.1397	4.0403	0.9338	1.0792	0.916	0.2388	0.2622	0.2416	0.0503	0.9352
2019072023.0	9.3738	79.8068	-7.8551	4.4913	1.6162	1.4035	1.3514	0.316	0.3425	0.2932	0.1141	1.6202
2019072100.0	9.7041	79.9934	-9.6382	5.0997	3.0673	2.3386	3.7494	0.37	0.3985	0.434	0.3115	3.0831
2019072101.0	10.761	80.0787	-4.6341	5.3104	3.2034	nan	3.7548	nan	nan	0.3761	nan	nan
2019072102.0	11.9011	80.1377	-37.8971	5.1269	nan	7.4398	3.8053	0.2651	0.2923	0.7055	0.937	nan
2019072103.0	13.0123	80.1971	-12.9873	5.9304	1.9278	2.159	1.9548	0.4348	0.4671	0.5533	0.169	1.9352
2019072104.0	14.1319	80.2563	-8.5008	6.1858	1.3935	1.4146	1.8166	0.3623	0.3934	0.4151	0.1094	1.3978
2019072105.0	15.2244	80.2958	nan	4.0092	nan	nan	nan	nan	nan	nan	nan	nan
2019072106.0	15.9502	80.2714	nan	1.2783	nan	nan	nan	nan	nan	nan	nan	nan
2019072107.0	16.8073	80.3233	1.838	nan	2.5026	6.0071	2.1631	0.3702	0.3761	0.3536	0.5123	2.5545
2019072108.0	17.3512	80.4128	nan	nan	nan	nan	nan	nan	nan	nan	nan	nan
2019072109.0	17.7886	80.54	nan	nan	nan	nan	nan	nan	nan	nan	nan	nan
2019072110.0	18.2544	80.6119	nan	nan	nan	nan	nan	nan	nan	nan	nan	nan
2019072111.0	18.2571	80.669	nan	nan	nan	nan	nan	nan	nan	nan	nan	nan
2019072112.0	18.2431	80.7215	nan	nan	nan	nan	nan	nan	nan	nan	nan	nan
2019072113.0	18.2227	80.7706	nan	nan	nan	nan	nan	nan	nan	nan	nan	nan
2019072114.0	18.2408	80.8116	nan	nan	nan	nan	nan	nan	nan	nan	nan	nan
2019072115.0	18.2973	80.8518	nan	nan	nan	nan	nan	nan	nan	nan	nan	nan
2019072116.0	18.3688	80.8897	nan	nan	nan	nan	nan	nan	nan	nan	nan	nan
2019072117.0	18.3814	80.9306	nan	nan	nan	nan	nan	nan	nan	nan	nan	nan
2019072118.0	18.4194	80.9657	nan	nan	nan	nan	nan	nan	nan	nan	nan	nan
2019072119.0	18.4387	81.0002	nan	nan	nan	nan	nan	nan	nan	nan	nan	nan
2019072120.0	18.405	81.0307	nan	nan	nan	nan	nan	nan	nan	nan	nan	nan
2019072121.0	18.4245	81.0409	nan	nan	nan	nan	nan	nan	nan	nan	nan	nan
2019072122.0	18.4372	81.0407	nan	nan	nan	nan	nan	nan	nan	nan	nan	nan
2019072123.0	18.4433	81.0397	-0.0295	nan	0.2815	0.3585	0.3014	0.0994	0.1001	0.0784	0.0192	0.2822
2019072200.0	18.4516	81.0393	nan	nan	nan	nan	nan	nan	nan	nan	nan	nan
2019072201.0	18.4446	81.0267	nan	nan	nan	nan	nan	nan	nan	nan	nan	nan
2019072202.0	18.4508	81.0162	nan	nan	nan	nan	nan	nan	nan	nan	nan	nan
2019072203.0	18.4439	80.981	nan	nan	nan	nan	nan	nan	nan	nan	nan	nan
2019072204.0	18.3413	80.9483	nan	nan	nan	nan	nan	nan	nan	nan	nan	nan
2019072205.0	18.4077	80.9191	-1.533	nan	0.9492	0.7077	0.9628	0.2402	0.2407	0.2068	0.0425	0.9501
2019072206.0	18.4316	80.8833	-6.0541	nan	1.0294	2.0752	1.0546	0.2933	0.2965	0.2745	0.0801	1.0325
2019072207.0	18.3575	80.8474	nan	nan	nan	nan	nan	nan	nan	nan	nan	nan
2019072208.0	18.286	80.8139	nan	nan	nan	nan	nan	nan	nan	nan	nan	nan
2019072209.0	18.3153	80.7793	nan	nan	nan	nan	nan	nan	nan	nan	nan	nan
2019072210.0	18.3867	80.7423	nan	nan	nan	nan	nan	nan	nan	nan	nan	nan
2019072211.0	18.3885	80.7082	nan	nan	nan	nan	nan	nan	nan	nan	nan	nan
2019072212.0	18.2568	80.6864	nan	nan	nan	nan	nan	nan	nan	nan	nan	nan
2019072213.0	18.0567	80.6672	nan	nan	nan	nan	nan	nan	nan	nan	nan	nan
2019072214.0	17.7233	80.6419	nan	nan	nan	nan	nan	nan	nan	nan	nan	nan
2019072215.0	17.6697	80.4604	-8.0757	nan	1.3294	1.4329	1.3299	0.3057	0.309	0.3469	0.0762	1.3316
2019072216.0	17.147	80.302	-2.5717	nan	1.3575	1.5184	0.9406	0.1898	0.196	0.2213	0.1856	1.3701
2019072217.0	16.07	80.192	-1.4394	nan	2.3499	0.6747	1.2829	0.154	0.1561	0.1409	0.0607	2.3507
2019072218.0	15.0607	80.0982	nan	nan	nan	nan	nan	nan	nan	nan	nan	nan
2019072219.0	14.5447	80.0542	-4.624	nan	0.8641	1.0825	0.8353	0.1665	0.1668	0.1552	0.0843	0.8682
2019072220.0	13.8615	80.0408	nan	nan	nan	nan	nan	nan	nan	nan	nan	nan
2019072221.0	12.6692	80.0283	-6.1227	nan	1.4822	1.7503	1.3314	0.3185	0.3245	0.4163	0.1551	1.4903
2019072222.0	11.4743	80.0209	-11.605	nan	2.7803	3.5407	3.6095	0.446	0.4532	0.5308	0.3504	2.8022
2019072223.0	10.3073	79.9921	-13.0622	nan	1.2448	1.4924	1.29	0.4215	0.418	0.3737	0.0916	1.2482
2019072300.0	9.5072	79.8543	-16.1082	nan	3.4141	2.0598	4.7097	0.4309	0.4356	0.4514	0.0884	3.4152
2019072301.0	9.3479	79.65	nan	nan	nan	nan	nan	nan	nan	nan	nan	nan
2019072302.0	9.2973	79.434	-24.1032	nan	nan	13.8234	9.4067	0.4684	0.4738	0.8242	2.2505	nan
2019072303.0	9.2597	79.2219	-12.3083	nan	2.9913	3.403	2.7471	0.545	0.5497	0.5062	0.2367	3.0007
2019072304.0	9.2176	79.0096	-9.9362	nan	3.7398	4.0247	4.0432	0.554	0.5622	0.4431	0.1994	3.7451
2019072305.0	9.1794	78.7984	-9.5979	nan	2.731	4.2271	2.974	0.5738	0.6056	0.5207	0.2178	2.7397
2019072306.0	9.4257	78.6	-15.2823	nan	3.0544	3.64	2.5543	0.5798	0.5917	0.5485	0.1538	3.0583
2019072307.0	9.9384	78.4097	-10.3965	5.1782	3.9782	5.5312	3.4881	0.5757	0.5971	0.5279	0.2353	3.9852
2019072308.0	10.427	78.2247	-11.7991	5.6698	3.6609	4.7777	3.7407	0.5061	0.5233	0.5252	0.1828	3.6654
2019072309.0	10.921	78.0364	-7.0767	5.116	2.7266	3.6481	2.8139	0.4841	0.5047	0.4882	0.1839	2.7328
2019072310.0	11.4238	77.8511	-6.1538	3.7523	1.774	2.4017	1.7077	0.3809	0.3997	0.3285	0.1005	1.7768
2019072311.0	11.9011	77.6615	-4.198	3.9615	2.4027	3.1899	1.6816	0.414	0.4375	0.3868	0.1808	2.4095
2019072312.0	12.3719	77.4699	-4.5108	3.2702	1.9862	2.9738	2.188	0.3325	0.353	0.2733	0.2496	2.0018
2019072313.0	12.8355	77.2774	-8.0533	2.3259	2.413	2.1698	2.5259	0.4127	0.4375	0.3554	0.1302	2.4165
2019072314.0	13.3784	77.1071	-5.1763	3.0164	1.4882	2.0737	1.7167	0.3272	0.3669	0.2585	0.1014	1.4916
2019072315.0	13.9254	76.941	-5.4449	2.7815	1.2106	1.5463	1.1576	0.2287	0.2648	0.2041	0.1039	1.215
2019072316.0	14.424	76.773	-1.3735	1.7738	1.9463	2.7865	1.2089	0.2585	0.3025	0.2648	0.2298	1.9598
2019072317.0	14.9179	76.6071	0.7481	1.6992	1.7126	2.2198	1.7185	0.2843	0.3259	0.2566	0.0963	1.7153
2019072318.0	15.4328	76.4414	-4.5673	2.728	1.0428	1.3549	0.9871	0.2487	0.2695	0.2555	0.0756	1.0455
2019072319.0	15.9788	76.2902	-4.5016	2.9995	0.9709	1.0167	1.3986	0.24	0.2489	0.2432	0.0781	0.9741
2019072320.0	16.7432	76.1889	-5.0972	3.3008	0.8207	1.246	1.0118	0.2268	0.2492	0.2557	0.1206	0.8295
2019072321.0	17.5153	76.0979	-11.9407	4.6854	1.6005	1.8681	1.6068	0.4068	0.4335	0.4355	0.157	1.6081
2019072322.0	18.279	76.005	-16.0435	5.9586	1.9303	2.1724	1.9388	0.4151	0.4604	0.4983	0.2158	1.9424
2019072323.0	19.0019	75.9124	-12.639	6.7268	1.8441	1.7373	1.854	0.369	0.4152	0.392	0.1893	1.8538
2019072400.0	19.6492	75.8299	-16.0228	7.1258	2.7817	3.1038	2.5094	0.4252	0.4799	0.5369	0.4737	2.8218
2019072401.0	20.27	75.7559	-16.8335	8.1357	1.5561	1.9123	1.4581	0.5505	0.5996	0.5543	0.0647	1.5574
2019072402.0	20.9117	75.6803	-30.2119	9.3606	2.2634	2.3555	2.0266	0.7457	0.7642	0.7345	0.1491	2.2683
2019072403.0	21.5653	75.5986	-35.1705	9.9194	2.5939	2.7407	2.5828	0.8273	0.846	0.8392	0.2451	2.6054
2019072404.0	22.2434	75.5138	nan	10.2683	nan	nan	nan	nan	nan	nan	nan	nan
2019072405.0	22.9324	75.4256	-15.3192	8.5755	1.429	1.5581	1.8436	0.649	0.6692	0.6048	0.103	1.4327
2019072406.0	23.6285	75.336	nan	8.6488	nan	nan	nan	nan	nan	nan	nan	nan
2019072407.0	24.3417	75.2481	-6.2128	6.899	0.9311	0.8905	0.8846	0.3783	0.3778	0.4018	0.0706	0.9338
2019072408.0	25.0174	75.1685	nan	5.949	nan	nan	nan	nan	nan	nan	nan	nan
2019072409.0	25.4999	75.1155	nan	5.2769	nan	nan	nan	nan	nan	nan	nan	nan
2019072410.0	26.1635	75.0149	nan	5.7349	nan	nan	nan	nan	nan	nan	nan	nan
2019072411.0	26.8562	74.9224	nan	5.0983	nan	nan	nan	nan	nan	nan	nan	nan
2019072412.0	27.5522	74.8328	-10.2097	5.6872	1.0599	1.0183	1.0609	0.3117	0.3324	0.3861	0.0821	1.0631
2019072413.0	28.2284	74.7409	nan	4.349	nan	nan	nan	nan	nan	nan	nan	nan
2019072414.0	28.9105	74.6508	nan	3.9205	nan	nan	nan	nan	nan	nan	nan	nan
2019072415.0	29.6011	74.5574	nan	5.2667	nan	nan	nan	nan	nan	nan	nan	nan
2019072416.0	29.9946	74.4996	nan	4.3176	nan	nan	nan	nan	nan	nan	nan	nan
2019072417.0	29.9767	74.4965	-13.0452	6.2066	1.3155	1.1858	1.2847	0.3735	0.4183	0.429	0.0409	1.3161
2019072418.0	29.9545	74.4957	-12.7302	7.0051	1.0498	1.6542	1.1261	0.357	0.4119	0.3898	0.0879	1.0535
2019072419.0	29.9346	74.4966	nan	7.0449	nan	nan	nan	nan	nan	nan	nan	nan
2019072420.0	29.9146	74.4996	-11.2462	7.2977	1.0916	0.9901	1.0704	0.3497	0.4038	0.3552	0.0255	1.0919
2019072421.0	29.8953	74.5026	-8.9901	7.2224	0.8202	0.936	0.8307	0.3084	0.3627	0.2912	0.0287	0.8207
2019072422.0	29.8757	74.5057	-10.0874	6.8515	1.1579	1.0966	1.275	0.3249	0.376	0.3304	0.037	1.1584
2019072423.0	29.8525	74.5093	-12.1576	7.0785	1.5007	1.2693	1.3768	0.3043	0.3621	0.3288	0.0705	1.5023
2019072500.0	29.8263	74.5133	-12.7752	6.9197	3.0157	2.5266	3.7862	0.3317	0.3941	0.3999	0.3397	3.0348
2019072501.0	29.8059	74.5183	-17.9055	7.5709	3.3472	3.919	3.306	0.3842	0.4508	0.4847	0.4071	3.3719
2019072502.0	29.7798	74.5192	nan	8.8423	nan	nan	nan	nan	nan	nan	nan	nan
2019072503.0	29.4231	74.4524	-16.2736	10.3513	3.5358	3.5897	2.5303	0.475	0.5438	0.6091	0.3917	3.5575
2019072504.0	28.9143	74.3586	-29.612	10.3871	3.156	2.6247	3.2644	0.5481	0.6202	0.5574	0.1501	3.1596
2019072505.0	28.4177	74.2624	nan	8.6362	nan	nan	nan	nan	nan	nan	nan	nan
2019072506.0	27.9215	74.1645	nan	8.3886	nan	nan	nan	nan	nan	nan	nan	nan
2019072507.0	27.423	74.0678	nan	7.9105	nan	nan	nan	nan	nan	nan	nan	nan
2019072508.0	26.9195	73.9817	nan	6.8315	nan	nan	nan	nan	nan	nan	nan	nan
2019072509.0	26.4466	73.9019	nan	5.3092	nan	nan	nan	nan	nan	nan	nan	nan
2019072510.0	26.3348	73.8877	-5.9042	4.6385	2.5622	2.8592	2.5887	0.4115	0.4224	0.4365	0.2254	2.572
2019072511.0	26.3366	73.8893	-9.4274	4.6764	2.3393	2.7484	2.7913	0.4411	0.4463	0.4744	0.2029	2.3481
2019072512.0	26.3365	73.8893	-9.5513	5.0553	4.0488	5.2301	4.1063	0.5263	0.5275	0.5193	0.6133	4.095
2019072513.0	26.3117	73.8855	nan	5.0435	nan	nan	nan	nan	nan	nan	nan	nan
2019072514.0	25.9072	73.8101	nan	4.9892	nan	nan	nan	nan	nan	nan	nan	nan
2019072515.0	25.3286	73.7196	-10.0324	4.2775	2.9022	3.0437	2.6649	0.4814	0.4901	0.4648	0.1206	2.9047
2019072516.0	24.734	73.6328	nan	4.3977	nan	nan	nan	nan	nan	nan	nan	nan
2019072517.0	24.1486	73.5267	nan	4.5053	nan	nan	nan	nan	nan	nan	nan	nan
2019072518.0	23.5786	73.4151	-9.9541	4.9096	2.5897	3.7453	3.4778	0.596	0.5947	0.5405	0.2013	2.5975
2019072519.0	23.0159	73.3073	-13.4508	6.0743	2.8759	3.6622	2.9976	0.6875	0.6939	0.6318	0.1867	2.8819
2019072520.0	22.4312	73.2041	-15.3608	6.3592	2.977	3.8771	2.9278	0.6995	0.7056	0.6751	0.2312	2.9859
2019072521.0	21.8548	73.1017	-13.2749	7.4835	2.023	2.8677	1.9729	0.7885	0.8042	0.7499	0.1554	2.0289
2019072522.0	21.2748	73.0035	-13.0463	8.4551	2.7643	2.7455	2.9294	0.9538	0.9591	0.9347	0.2111	2.7724
2019072523.0	20.6929	72.8927	-7.7595	9.4309	4.335	5.2911	3.633	0.9773	0.9923	0.9498	0.5603	4.371
2019072600.0	20.1121	72.7825	-6.3403	9.8649	2.2283	2.0706	2.328	0.9277	0.9415	1.0026	0.0824	2.2299
2019072601.0	19.5312	72.6785	-11.5179	9.219	3.8792	3.2006	4.1014	1.1065	1.1547	1.196	0.3454	3.8946
2019072602.0	19.2483	72.6313	nan	9.6626	nan	nan	nan	nan	nan	nan	nan	nan
2019072603.0	19.2492	72.6313	-17.7418	10.0307	2.5385	2.6881	2.5719	0.8365	0.8465	0.8018	0.2057	2.5468
2019072604.0	19.2492	72.6313	-15.6593	8.8734	2.1763	2.233	1.888	0.7402	0.7559	0.6856	0.1401	2.1808
2019072605.0	19.2492	72.6313	-11.5541	7.2121	1.9325	2.0013	1.6878	0.6039	0.6284	0.5382	0.1181	1.9361
2019072606.0	19.2491	72.6329	-8.0934	5.8659	1.6596	1.5872	1.7628	0.4809	0.4876	0.49	0.1192	1.6639
2019072607.0	19.2562	72.6331	-5.3396	3.9143	1.1136	0.9323	1.5097	0.2911	0.3088	0.3296	0.058	1.1151
2019072608.0	19.2638	72.6336	-4.4423	4.1015	0.9359	1.8932	1.1218	0.331	0.3422	0.317	0.0869	0.9399
2019072609.0	19.2642	72.6359	nan	4.9818	nan	nan	nan	nan	nan	nan	nan	nan
2019072610.0	19.2646	72.6364	-7.0619	6.1314	1.187	1.4194	1.2572	0.4901	0.4967	0.4768	0.0753	1.1894
2019072611.0	19.2658	72.6366	-6.415	6.7936	1.4183	1.6028	1.6107	0.5514	0.5575	0.4864	0.0597	1.4196
2019072612.0	19.2657	72.6368	-7.9261	7.3393	1.8886	1.9862	1.8594	0.585	0.5969	0.5678	0.1132	1.892
2019072613.0	19.2626	72.6355	nan	6.6164	nan	nan	nan	nan	nan	nan	nan	nan
2019072614.0	19.2697	72.6474	nan	6.8112	nan	nan	nan	nan	nan	nan	nan	nan
2019072615.0	19.2444	72.6586	nan	6.7841	nan	nan	nan	nan	nan	nan	nan	nan
2019072616.0	19.2256	72.6666	nan	6.7456	nan	nan	nan	nan	nan	nan	nan	nan
2019072617.0	19.3477	72.6596	nan	6.0299	nan	nan	nan	nan	nan	nan	nan	nan
2019072618.0	19.3471	72.6593	-7.2297	6.381	1.369	1.3738	1.3299	0.5223	0.5159	0.463	0.06	1.3703
2019072619.0	19.3465	72.6592	-4.1581	5.9889	1.307	1.1628	1.3763	0.4613	0.4548	0.3774	0.0556	1.3082
2019072620.0	19.3454	72.6592	-3.9061	5.9532	1.931	1.6718	2.048	0.4464	0.4484	0.4519	0.1546	1.9372
2019072621.0	19.3444	72.6591	-8.6893	6.684	2.0371	2.0956	2.1653	0.4323	0.4659	0.4349	0.248	2.0521
2019072622.0	19.3434	72.6591	-9.948	5.845	1.4966	1.474	1.4123	0.3679	0.4028	0.3941	0.1092	1.5006
2019072623.0	19.3423	72.6591	-10.5201	6.4863	3.1416	2.3923	3.0993	0.456	0.4694	0.463	0.3268	3.1586
2019072700.0	19.3417	72.6591	-8.4246	6.377	1.7059	1.8262	1.7022	0.5063	0.5079	0.5583	0.1033	1.709
2019072701.0	19.3414	72.6591	-4.3123	6.6932	1.5047	1.4915	1.6129	0.5221	0.5207	0.4589	0.0573	1.5058
2019072702.0	19.3408	72.6591	-22.5868	7.1196	3.7913	3.8632	3.4272	0.5314	0.5401	0.5712	0.2196	3.7977
2019072703.0	19.3402	72.6591	-8.6212	6.944	1.9776	1.9828	1.6753	0.5249	0.5208	0.5081	0.149	1.9832
2019072704.0	19.3397	72.6591	-5.9085	6.105	1.9633	2.1598	1.9044	0.4579	0.4643	0.4264	0.2712	1.9819
2019072705.0	19.3395	72.6591	-5.2232	5.3212	1.2978	1.4179	1.489	0.3999	0.4007	0.3777	0.0778	1.3001
2019072706.0	19.3388	72.6592	-4.125	5.5926	1.3867	1.539	1.8877	0.4046	0.4109	0.3566	0.1311	1.3928
2019072707.0	19.3223	72.66	-4.5678	5.7121	1.2859	1.2944	1.5181	0.3262	0.3558	0.3106	0.1057	1.2902
2019072708.0	19.3054	72.6609	-4.8347	6.5932	1.5392	2.0543	1.5064	0.309	0.3516	0.3737	0.1916	1.551
2019072709.0	19.2891	72.6617	-7.8903	6.2141	1.7173	1.655	1.9809	0.2902	0.3273	0.3239	0.166	1.7253
2019072710.0	19.2688	72.6627	-10.9164	7.1894	2.8024	3.8445	2.9738	0.327	0.3652	0.4334	0.392	2.8297
2019072711.0	19.2513	72.6637	nan	8.0932	nan	nan	nan	nan	nan	nan	nan	nan
2019072712.0	19.2562	72.6683	-19.5563	10.0836	2.1964	2.3362	1.9558	0.5687	0.6233	0.5664	0.0878	2.1982
2019072713.0	19.2719	72.6716	-17.6407	9.7523	2.6694	2.7071	2.8638	0.5488	0.6262	0.5367	0.1546	2.6738
2019072714.0	19.1906	72.6344	nan	10.1125	nan	nan	nan	nan	nan	nan	nan	nan
2019072715.0	18.8972	72.501	-16.0303	9.2856	2.8062	3.4077	3.2206	0.5828	0.6545	0.6216	0.2048	2.8137
2019072716.0	18.6396	72.3611	-17.0745	10.209	4.0411	6.9973	5.4199	0.7132	0.8237	0.7627	0.4614	4.0673
2019072717.0	18.2909	72.2446	-22.207	10.2724	5.0264	4.9692	5.1627	0.5702	0.6499	0.6579	0.6193	5.0644
2019072718.0	17.9148	72.1376	-18.4683	9.7008	4.8043	4.6037	4.268	0.6397	0.7344	0.6742	0.4273	4.8233
2019072719.0	17.5819	72.0181	-17.1575	9.5645	4.0976	4.4137	3.7094	0.6115	0.7067	0.8094	0.5621	4.136
2019072720.0	17.2429	71.896	-16.2864	9.3868	2.8904	3.7608	3.2667	0.6874	0.783	0.6061	0.2324	2.8997
2019072721.0	16.9142	71.7705	-27.6009	9.8408	3.5424	3.837	3.5776	0.6986	0.8057	0.695	0.203	3.5482
2019072722.0	16.5601	71.6457	-19.7262	9.7709	3.2341	4.1716	2.5502	0.6608	0.7595	0.6461	0.2842	3.2466
2019072800.0	15.8558	71.379	-20.9899	10.2882	2.8381	2.7989	2.5953	0.6927	0.8002	0.7797	0.175	2.8435
2019072801.0	15.4935	71.2408	-25.4974	11.2525	3.5343	3.6934	3.8556	0.7302	0.845	0.7055	0.1846	3.5391
2019072802.0	15.1489	71.1044	-24.4807	12.1638	2.591	3.4602	2.3451	0.6555	0.7503	0.6109	0.1907	2.5981
2019072803.0	14.8067	70.9698	-29.9024	12.2972	3.613	3.6466	3.092	0.703	0.8067	0.7851	0.1908	3.618
2019072804.0	14.4801	70.8426	nan	12.8651	nan	nan	nan	nan	nan	nan	nan	nan
2019072805.0	14.1732	70.7204	nan	12.932	nan	nan	nan	nan	nan	nan	nan	nan
2019072806.0	13.879	70.6045	nan	12.7895	nan	nan	nan	nan	nan	nan	nan	nan
2019072807.0	13.5868	70.4863	-29.8106	13.0164	3.4771	3.9537	2.9392	0.71	0.7987	0.7513	0.1421	3.48
2019072808.0	13.276	70.3624	nan	13.204	nan	nan	nan	nan	nan	nan	nan	nan
2019072809.0	12.9665	70.2353	nan	13.3133	nan	nan	nan	nan	nan	nan	nan	nan
2019072810.0	12.6648	70.107	nan	13.5975	nan	nan	nan	nan	nan	nan	nan	nan
2019072811.0	12.3518	69.9799	nan	13.5484	nan	nan	nan	nan	nan	nan	nan	nan
2019072812.0	12.0239	69.8536	nan	13.0604	nan	nan	nan	nan	nan	nan	nan	nan
2019072813.0	11.7009	69.7239	nan	12.9093	nan	nan	nan	nan	nan	nan	nan	nan
2019072814.0	11.386	69.5967	nan	13.8819	nan	nan	nan	nan	nan	nan	nan	nan
2019072815.0	11.0859	69.4704	nan	13.3344	nan	nan	nan	nan	nan	nan	nan	nan
2019072816.0	10.7991	69.3421	nan	13.568	nan	nan	nan	nan	nan	nan	nan	nan
2019072817.0	10.4894	69.21	nan	13.7908	nan	nan	nan	nan	nan	nan	nan	nan
2019072818.0	10.1829	69.0812	nan	13.3211	nan	nan	nan	nan	nan	nan	nan	nan
2019072819.0	9.8828	68.9513	nan	13.8848	nan	nan	nan	nan	nan	nan	nan	nan
2019072820.0	9.5624	68.8226	nan	12.7819	nan	nan	nan	nan	nan	nan	nan	nan
2019072821.0	9.2721	68.6905	nan	13.143	nan	nan	nan	nan	nan	nan	nan	nan
2019072822.0	8.9874	68.5582	nan	13.1678	nan	nan	nan	nan	nan	nan	nan	nan
2019072823.0	8.7656	68.418	nan	14.015	nan	nan	nan	nan	nan	nan	nan	nan
2019072900.0	8.5624	68.278	nan	15.1739	nan	nan	nan	nan	nan	nan	nan	nan
2019072901.0	8.3806	68.1356	nan	14.9144	nan	nan	nan	nan	nan	nan	nan	nan
2019072902.0	8.2112	67.9974	nan	14.9598	nan	nan	nan	nan	nan	nan	nan	nan
2019072903.0	8.0348	67.8654	nan	14.105	nan	nan	nan	nan	nan	nan	nan	nan
2019072904.0	7.8501	67.7264	nan	14.4616	nan	nan	nan	nan	nan	nan	nan	nan
2019072905.0	7.6585	67.5779	nan	15.2183	nan	nan	nan	nan	nan	nan	nan	nan
2019072906.0	7.4664	67.4297	nan	14.5671	nan	nan	nan	nan	nan	nan	nan	nan
2019072907.0	7.2789	67.2853	nan	14.3044	nan	nan	nan	nan	nan	nan	nan	nan
2019072908.0	7.0853	67.1456	nan	14.5746	nan	nan	nan	nan	nan	nan	nan	nan
2019072909.0	6.9032	67.0034	nan	14.1466	nan	nan	nan	nan	nan	nan	nan	nan
2019072910.0	6.7258	66.8581	nan	15.0321	nan	nan	nan	nan	nan	nan	nan	nan
2019072911.0	6.5526	66.7138	nan	14.5938	nan	nan	nan	nan	nan	nan	nan	nan
2019072912.0	6.3737	66.5683	nan	14.407	nan	nan	nan	nan	nan	nan	nan	nan
2019072913.0	6.185	66.4277	nan	14.3892	nan	nan	nan	nan	nan	nan	nan	nan
2019072914.0	6.0182	66.2921	-20.41	13.7379	2.7667	3.0922	2.7691	0.7181	0.816	0.6373	0.1776	2.7724
2019072915.0	5.8652	66.1601	-17.4691	12.8958	2.5769	2.6626	2.6706	0.735	0.829	0.7207	nan	nan
2019072916.0	5.7068	66.0276	nan	13.5309	nan	nan	nan	nan	nan	nan	nan	nan
2019072917.0	5.5421	65.8925	-15.2559	13.7472	2.2194	2.3906	2.2126	0.7185	0.8236	0.6637	0.1135	2.2223
2019072918.0	5.3771	65.7611	-20.7224	13.5405	2.672	2.4022	2.3566	0.7311	0.8262	0.7071	0.0585	2.6726
2019072919.0	5.216	65.6292	-18.6297	13.5049	2.4157	2.558	2.6759	0.7261	0.8314	0.7655	0.1182	2.4186
2019072920.0	5.0545	65.4929	-21.8288	13.0018	2.6097	2.9355	2.4649	0.7736	0.8958	0.7565	0.0848	2.6111
2019072921.0	4.8861	65.3495	-21.2164	13.333	2.2273	2.2061	2.2404	0.6836	0.792	0.5977	0.0732	2.2285
2019072922.0	4.708	65.2026	-18.61	12.2483	1.9926	2.1538	2.0277	0.6075	0.7179	0.5779	0.0956	1.9948
2019072923.0	4.5334	65.0512	-24.3226	11.5864	2.2402	2.2959	2.3219	0.5987	0.7017	0.5898	0.1046	2.2426
2019073000.0	4.3549	64.8989	-19.8458	11.8081	2.338	2.3233	2.374	0.5664	0.6605	0.5482	0.1701	2.3441
2019073001.0	4.1891	64.7515	-19.178	11.2589	2.0592	2.0265	2.499	0.5275	0.6093	0.5708	0.0623	2.0602
2019073002.0	4.0323	64.6085	nan	10.9911	nan	nan	nan	nan	nan	nan	nan	nan
2019073003.0	3.8541	64.4642	-13.3802	10.7713	1.5013	1.7912	1.7392	0.4536	0.5235	0.4533	0.104	1.5049
2019073004.0	3.6805	64.3161	-14.0184	9.9199	1.5668	1.6991	1.8754	0.4389	0.5094	0.4524	0.1087	1.5706
2019073005.0	3.5148	64.1666	nan	10.0384	nan	nan	nan	nan	nan	nan	nan	nan
2019073006.0	3.3471	64.0201	-14.0603	9.9722	1.941	2.2984	1.8417	0.517	0.5904	0.5364	0.1279	1.9452
2019073007.0	3.1701	63.8719	5.1138	10.4376	1.8999	2.2191	1.7093	0.5381	0.6419	0.5603	0.1222	1.9038
2019073008.0	2.9945	63.7319	-9.1759	10.9937	2.1978	2.2004	2.4385	0.5651	0.6565	0.5256	0.1464	2.2026
2019073009.0	2.8257	63.599	-15.0481	11.4007	2.5389	2.9562	2.6975	0.5899	0.6821	0.6291	0.1901	2.546
2019073010.0	2.6479	63.4645	-15.6515	12.102	2.6758	2.652	2.9295	0.5827	0.6743	0.647	0.1858	2.6822
2019073011.0	2.4702	63.3278	-20.832	12.0408	2.5075	2.5106	2.5303	0.5733	0.6596	0.5725	0.1424	2.5116
2019073012.0	2.2891	63.189	-12.131	11.9858	2.4936	2.7829	2.4673	0.6097	0.6905	0.6422	0.2141	2.5028
2019073013.0	2.1175	63.056	-5.747	13.0297	3.0586	2.7777	3.9834	0.6186	0.7562	0.6062	0.3134	3.0747
2019073014.0	1.9514	62.9242	-15.7828	12.9755	2.0715	2.6033	2.0313	0.5808	0.6691	0.6092	0.1746	2.0789
2019073015.0	1.7927	62.7921	nan	12.3886	nan	nan	nan	nan	nan	nan	nan	nan
2019073016.0	1.6351	62.6643	nan	11.4605	nan	nan	nan	nan	nan	nan	nan	nan
2019073017.0	1.483	62.5413	-2.5812	11.5748	1.7431	2.0502	2.2105	0.5355	0.5894	0.4494	0.0663	1.7444
2019073018.0	1.3179	62.4154	-2.3549	10.9422	1.5923	1.7676	1.4999	0.4449	0.5072	0.4258	0.0923	1.595
2019073019.0	1.1529	62.2847	-5.5636	9.9904	1.6326	1.7293	1.7373	0.4799	0.5534	0.4606	0.0868	1.6349
2019073020.0	0.9903	62.1489	-3.3788	9.4776	1.0592	1.3493	1.0474	0.3584	0.4121	0.3907	0.0348	1.0598
2019073021.0	0.8281	62.0193	-4.4517	7.8898	0.9589	1.0281	1.1059	0.2945	0.3378	0.3106	0.058	0.9607
2019073022.0	0.676	61.8931	-3.8042	6.6863	1.056	1.2161	1.2052	0.2759	0.3181	0.2796	0.0584	1.0577
2019073023.0	0.5215	61.7634	-3.8022	6.8407	1.646	1.5917	2.3025	0.354	0.4082	0.3876	0.1651	1.6543
2019073100.0	0.3644	61.635	nan	4.5286	nan	nan	nan	nan	nan	nan	nan	nan
2019073101.0	0.2117	61.5095	-1.3271	1.3198	1.8978	1.8887	1.7507	0.1274	0.1473	0.2238	0.2429	1.9133
2019073102.0	0.0634	61.3864	nan	1.8941	nan	nan	nan	nan	nan	nan	nan	nan
2019073103.0	-0.0866	61.2637	-7.2406	0.9676	2.5774	1.4694	3.0176	0.129	0.1519	0.2395	0.2538	2.5899
2019073104.0	-0.2342	61.1404	nan	0.7587	nan	nan	nan	nan	nan	nan	nan	nan
2019073105.0	-0.3821	61.0164	0.1459	2.4446	0.9491	0.9556	0.993	0.1378	0.159	0.1534	0.0951	0.9539
2019073106.0	-0.5247	60.8953	nan	1.5964	nan	nan	nan	nan	nan	nan	nan	nan
2019073107.0	-0.6	60.7629	0.1552	0.2275	0.6617	nan	0.8092	nan	nan	0.1166	nan	nan
2019073108.0	-0.6009	60.6177	9.2788	0.8943	2.1579	1.7209	1.3991	0.1335	0.1592	0.2396	0.2128	2.1683
2019073109.0	-0.5982	60.4754	nan	3.8157	nan	nan	nan	nan	nan	nan	nan	nan
2019073110.0	-0.6868	60.3482	4.4857	3.3039	0.9533	1.3318	0.9274	0.2462	0.2828	0.3541	0.1578	0.9663
2019073111.0	-0.8383	60.2339	-1.6724	4.805	0.465	0.5635	0.4502	0.1974	0.231	0.2001	0.0387	0.4666
2019073112.0	-0.9873	60.1168	0.691	nan	0.4851	0.4743	0.5947	0.1732	0.2023	0.1782	0.0405	0.4868
2019073113.0	-1.1318	59.9799	-1.527	nan	0.6356	0.5049	0.7101	0.1686	0.1925	0.1817	0.0349	0.6365
2019073114.0	-1.2232	59.8323	-1.6968	nan	0.5164	0.7208	0.6057	0.1691	0.1966	0.1878	0.0592	0.5198
2019073115.0	-1.2363	59.7004	-1.2904	nan	0.2804	0.4014	0.274	0.124	0.1461	0.1305	0.0171	0.2809
2019073116.0	-1.2618	59.5723	-0.3535	nan	0.6238	0.6372	0.5001	0.1008	0.1181	0.134	0.0501	0.6258
2019073117.0	-1.292	59.4409	-0.7171	nan	0.2618	0.3394	0.2382	0.0912	0.105	0.0837	0.0319	0.2638
2019073118.0	-1.3191	59.3075	-0.3735	nan	0.246	0.3184	0.2583	0.0946	0.1096	0.0894	0.0205	0.2469
2019073119.0	-1.3403	59.1745	-0.7235	nan	0.3346	nan	0.366	nan	nan	0.1173	nan	nan
2019073120.0	-1.3618	59.0414	-0.2592	nan	0.2997	0.3565	0.391	0.1017	0.1201	0.1083	0.0306	0.3012
2019073121.0	-1.3704	58.9089	nan	nan	nan	nan	nan	nan	nan	nan	nan	nan
2019073122.0	-1.3969	58.7765	3.1107	nan	1.4818	1.6948	1.6032	0.2062	0.2374	0.2528	0.2717	1.5066
2019073123.0	-1.4249	58.6538	4.5493	nan	4.8676	4.9496	4.5362	0.2103	0.2434	0.4531	0.8259	4.9372
2019080100.0	-1.4412	58.532	-2.8419	nan	2.6838	2.8047	2.6147	0.1771	0.2046	0.239	0.4357	2.7189
2019080101.0	-1.4564	58.4163	-2.8861	nan	2.1996	nan	2.5357	nan	nan	0.2145	nan	nan
2019080102.0	-1.473	58.301	-1.739	nan	1.3376	1.6568	1.3064	0.2133	0.2458	0.2034	0.116	1.3426
2019080103.0	-1.4899	58.1853	nan	nan	nan	nan	nan	nan	nan	nan	nan	nan
2019080104.0	-1.5028	58.0697	2.0642	nan	2.0232	3.3717	2.4232	0.2373	0.2734	0.2865	0.3164	2.0478
2019080105.0	-1.4982	57.9536	-0.583	nan	1.6274	2.383	1.6873	0.3022	0.3378	0.3348	0.2008	1.6398
2019080106.0	-1.4944	57.8317	nan	nan	nan	nan	nan	nan	nan	nan	nan	nan
2019080107.0	-1.4922	57.713	nan	nan	nan	nan	nan	nan	nan	nan	nan	nan
2019080108.0	-1.485	57.5847	-12.7358	nan	3.4433	3.5295	3.667	0.3423	0.4013	0.5373	0.255	3.4527
2019080109.0	-1.5324	57.455	-5.455	nan	1.6751	2.7121	2.0623	0.3364	0.3921	0.3904	0.2894	1.6999
2019080110.0	-1.7016	57.3427	-2.5192	nan	1.2413	1.5373	0.918	0.2796	0.3204	0.3229	0.2045	1.2581
2019080111.0	-1.8437	57.2512	-0.4161	nan	0.9554	0.8163	1.5026	0.2402	0.2789	0.252	0.0875	0.9594
2019080112.0	-1.958	57.1833	nan	nan	nan	nan	nan	nan	nan	nan	nan	nan
2019080113.0	-2.0131	57.1613	nan	nan	nan	nan	nan	nan	nan	nan	nan	nan
2019080114.0	-2.0788	57.1448	nan	nan	nan	nan	nan	nan	nan	nan	nan	nan
2019080115.0	-2.0887	57.1462	nan	nan	nan	nan	nan	nan	nan	nan	nan	nan
2019080116.0	-2.0887	57.1462	nan	nan	nan	nan	nan	nan	nan	nan	nan	nan
2019080117.0	-2.0887	57.1462	nan	nan	nan	nan	nan	nan	nan	nan	nan	nan
2019080118.0	-2.0887	57.1462	nan	nan	nan	nan	nan	nan	nan	nan	nan	nan
2019080119.0	-2.0887	57.1462	nan	nan	nan	nan	nan	nan	nan	nan	nan	nan
2019080120.0	-2.0887	57.1462	nan	nan	nan	nan	nan	nan	nan	nan	nan	nan
2019080121.0	-2.0887	57.1462	nan	nan	nan	nan	nan	nan	nan	nan	nan	nan
2019080122.0	-2.0887	57.1462	nan	nan	nan	nan	nan	nan	nan	nan	nan	nan
2019080123.0	-2.0887	57.1462	nan	nan	nan	nan	nan	nan	nan	nan	nan	nan
