# Supplementary material for: Uncertainties in eddy covariance air-sea CO 2 flux measurements and implications for gas transfer velocity parameterisations
Source: Copernicus journal article supplement (doi:10.5194/acp-2021-120), 2021-02-19
Supplement: Supplementary file 1 [file acp-2021-120-supplement.zip › JR18007_uncertainty.txt]

Datatime	Lon (o)	Lat(o)	co2flux (mmol/m2/day)	U10N (m/s)	dFR_Finkelstein (mmol/m2/day)	dFR_Blomquist (mmol/m2/day)	dFR_Wienhold (mmol/m2/day)	dFRN_Mauder (mmol/m2/day)	dFRN_Blomquist (mmol/m2/day)	dFRN_Billesbach (mmol/m2/day)	dFS_Lenschow (mmol/m2/day)	dF_all (mmol/m2/day)
2019080508.0	-0.5344	59.7311	-5.504	nan	1.4342	1.274	1.4166	0.3221	0.3856	0.3324	0.0338	1.4346
2019080509.0	-0.4617	59.8983	-2.2025	7.908	1.8863	2.0271	2.3252	0.3358	0.4002	0.3758	0.2022	1.8971
2019080510.0	-0.3799	60.0734	-2.4531	7.5722	1.493	1.565	1.7435	0.3107	0.3745	0.355	0.1311	1.4987
2019080511.0	-0.2906	60.2623	-6.563	6.4849	1.7688	2.4135	1.7016	0.2995	0.3562	0.3654	0.2213	1.7825
2019080512.0	-0.2316	60.4369	-4.2299	6.1726	1.2524	1.5614	1.6467	0.2566	0.3065	0.2719	0.1652	1.2632
2019080513.0	-0.1742	60.631	-2.2832	5.316	1.0232	1.2622	1.1124	0.2466	0.2927	0.2311	0.0768	1.0261
2019080514.0	-0.1182	60.8116	-1.5709	4.7023	1.1733	1.7424	1.032	0.2151	0.2535	0.2451	0.1883	1.1883
2019080515.0	-0.1108	60.9956	-3.0542	3.5821	1.4226	1.4232	1.5338	0.1917	0.2283	0.2352	0.1773	1.4336
2019080516.0	-0.1665	61.1836	-1.481	3.5709	0.953	1.1409	1.04	0.2096	0.2484	0.1906	0.0489	0.9543
2019080517.0	-0.2179	61.3741	-6.7313	2.957	2.2102	2.27	1.4815	0.2015	0.2369	0.2755	0.3167	2.2328
2019080518.0	-0.2739	61.5673	-2.8456	3.0017	0.6367	0.8364	0.6152	0.1506	0.1753	0.1705	0.065	0.64
2019080519.0	-0.3296	61.7677	-3.4573	4.6768	0.7677	0.7446	1.03	0.1868	0.22	0.2089	0.0621	0.7702
2019080520.0	-0.3914	61.9659	-6.3682	6.7429	1.182	1.1508	0.9433	0.271	0.3176	0.3417	0.1132	1.1874
2019080521.0	-0.447	62.1645	-12.8314	8.8714	1.5393	1.6785	1.5502	0.3654	0.4292	0.4313	0.1509	1.5466
2019080522.0	-0.504	62.3594	-16.8916	9.9834	1.5026	1.7184	1.5273	0.4163	0.4852	0.4776	0.2029	1.5162
2019080523.0	-0.5576	62.5535	-7.2694	10.0257	2.5805	3.5181	2.2847	0.4358	0.5043	0.6327	0.5152	2.6315
2019080600.0	-0.6242	62.7457	-12.7947	9.762	1.4186	1.4874	1.3602	0.4246	0.4941	0.4363	0.0994	1.422
2019080601.0	-0.6987	62.9434	-15.3031	9.5687	1.8759	1.8239	2.009	0.434	0.5041	0.4563	0.1929	1.8858
2019080602.0	-0.7592	63.14	-15.6077	9.1356	2.8727	2.9406	2.3664	0.4087	0.4788	0.6525	0.4112	2.902
2019080603.0	-0.8133	63.3336	-11.6226	8.3692	2.7321	3.0842	2.4272	0.421	0.4911	0.5649	0.4411	2.7675
2019080604.0	-0.8606	63.5256	-18.6649	8.764	3.8185	3.3004	4.0674	0.4324	0.5	0.5322	0.5152	3.8531
2019080605.0	-0.9173	63.7177	-16.757	8.6873	2.123	2.0492	1.9944	0.4128	0.4846	0.4562	0.172	2.13
2019080606.0	-0.9775	63.9116	-13.1881	8.2416	3.2042	3.4833	4.0779	0.3876	0.459	0.5871	0.4331	3.2333
2019080607.0	-1.0363	64.1067	-9.6674	7.8673	1.7002	1.5863	1.6627	0.3814	0.4433	0.4236	0.0748	1.7019
2019080608.0	-1.0924	64.2999	-13.0827	6.0638	2.9081	4.7897	3.5228	0.3262	0.3861	0.6163	0.8503	3.0298
2019080609.0	-1.1608	64.4988	-10.5491	5.5127	1.4165	1.4532	1.3079	0.2802	0.337	0.2959	0.0911	1.4194
2019080610.0	-1.2264	64.6982	-7.2711	4.4536	1.5097	1.5162	1.8048	0.3083	0.3621	0.3016	0.086	1.5122
2019080611.0	-1.2912	64.8956	-5.8496	5.4844	2.8319	2.9379	3.2265	0.3834	0.4503	0.4055	0.2785	2.8455
2019080612.0	-1.3504	65.0906	-4.7331	6.2498	1.8815	2.2087	1.7375	0.3781	0.4413	0.3595	0.1487	1.8874
2019080613.0	-1.4086	65.286	-11.8205	7.1705	2.0692	2.1066	2.3095	0.3959	0.4753	0.3848	0.0402	2.0695
2019080614.0	-1.4643	65.4794	-5.3363	6.4782	2.0765	2.5738	2.1882	0.4179	0.488	0.4077	0.1739	2.0838
2019080615.0	-1.5361	65.6721	0.1488	5.9707	3.1317	2.1328	2.4825	0.3705	0.4356	0.4048	0.1615	3.1359
2019080616.0	-1.6082	65.8642	-0.8799	7.017	3.0814	4.113	3.3055	0.4594	0.5275	0.4881	0.3867	3.1056
2019080617.0	-1.677	66.0616	-11.9769	6.4032	2.647	2.812	2.5064	0.5614	0.6073	0.5902	0.1774	2.653
2019080618.0	-1.7412	66.2586	-5.5546	5.2126	3.6133	2.7979	3.1318	0.5279	0.5618	0.5332	0.2619	3.6228
2019080619.0	-1.8114	66.4593	-5.8748	4.5479	1.8019	3.0063	1.7576	0.5214	0.5425	0.4931	0.1562	1.8087
2019080620.0	-1.8792	66.6599	-2.8667	3.6549	1.9252	2.3531	1.9151	0.4936	0.5104	0.4487	0.1222	1.9291
2019080621.0	-1.9511	66.8592	-5.265	4.0229	2.0183	2.4789	1.8939	0.512	0.5321	0.4981	0.0815	2.02
2019080622.0	-2.0176	67.0593	-5.5159	3.4339	2.8576	3.214	2.9601	0.5397	0.5621	0.5177	0.2226	2.8662
2019080623.0	-2.095	67.2622	4.5213	3.3923	3.9315	4.4116	2.7482	0.432	0.4758	0.524	0.7054	3.9943
2019080700.0	-2.1659	67.4665	0.0452	3.0867	2.5362	2.4393	2.6385	0.4158	0.4578	0.376	0.2008	2.5441
2019080701.0	-2.2433	67.6661	-0.1612	2.7891	1.7933	2.0759	1.3389	0.3819	0.4088	0.3789	0.2073	1.8052
2019080702.0	-2.2892	67.8613	-8.1976	2.8669	5.3038	10.7547	5.3753	0.3804	0.4045	0.5667	1.1333	5.4235
2019080703.0	-2.3376	68.0568	0.1935	1.5262	1.3783	1.5631	1.186	0.2874	0.3137	0.2503	0.1336	1.3847
2019080704.0	-2.4438	68.2541	-1.977	2.864	nan	1.995	2.1258	0.3271	0.3887	0.3148	0.1612	nan
2019080705.0	-2.5249	68.4532	15.6586	2.3192	1.7517	5.2598	4.5644	0.2955	0.3476	0.4334	0.8518	1.9478
2019080706.0	-2.6001	68.6511	-8.4169	2.7937	2.7053	3.4452	3.5434	0.3269	0.3799	0.4358	0.3502	2.7278
2019080707.0	-2.6752	68.85	-2.7026	2.5661	1.1308	1.6087	1.1958	0.2927	0.3477	0.2933	0.0697	1.1329
2019080708.0	-2.7484	69.053	-6.248	3.1743	1.147	1.9832	1.4248	0.3137	0.3651	0.3056	0.1057	1.1519
2019080709.0	-2.832	69.2574	-6.1176	4.1561	1.5433	1.6865	1.987	0.2731	0.3221	0.2932	0.1097	1.5472
2019080710.0	-2.9127	69.4517	nan	4.5816	nan	nan	nan	nan	nan	nan	nan	nan
2019080711.0	-2.9238	69.5232	-5.0961	5.0633	3.0733	3.2183	2.6049	0.4468	0.4664	0.4176	0.2111	3.0805
2019080712.0	-2.9238	69.5232	-8.5672	2.9082	2.5065	2.9088	2.5112	0.32	0.3541	0.306	0.1936	2.5139
2019080713.0	-2.9238	69.5232	nan	3.7711	nan	nan	nan	nan	nan	nan	nan	nan
2019080714.0	-2.9023	69.5276	-13.9859	9.4824	2.7586	3.6801	2.9075	0.7125	0.7224	0.7194	0.4017	2.7877
2019080715.0	-2.8784	69.5975	nan	9.9579	nan	nan	nan	nan	nan	nan	nan	nan
2019080716.0	-2.9791	69.7879	-22.0613	11.2376	2.5445	2.688	2.7408	0.716	0.7529	0.809	0.1764	2.5506
2019080717.0	-3.0811	69.9845	-19.4626	10.5707	2.1333	2.3196	2.3811	0.7622	0.7653	0.753	0.1402	2.1379
2019080718.0	-3.1965	70.1785	-21.5463	11.0092	2.5045	2.8635	2.4551	0.8627	0.8635	0.8575	0.2001	2.5125
2019080719.0	-3.2696	70.371	-16.1636	10.8104	2.1925	2.5614	2.3177	0.8555	0.8502	0.842	0.1246	2.196
2019080720.0	-3.3615	70.5692	-21.0021	10.5289	2.2831	2.8549	1.9763	0.8104	0.8125	0.7917	0.2229	2.2939
2019080721.0	-3.434	70.7726	-25.333	10.765	2.3263	2.6265	2.3046	0.8676	0.8808	0.828	0.1385	2.3304
2019080722.0	-3.5329	70.9777	-25.5928	10.0791	2.9078	2.8288	3.2105	0.8162	0.8153	0.8609	0.2174	2.9159
2019080723.0	-3.6368	71.1913	-21.0637	10.7257	2.2428	2.6177	2.4184	0.8645	0.869	0.9038	0.1571	2.2483
2019080800.0	-3.7195	71.4036	-17.0635	10.1002	1.93	2.3143	2.1027	0.7957	0.8118	0.8036	0.1017	1.9327
2019080801.0	-3.8044	71.615	-16.4619	9.396	1.7747	2.281	1.9752	0.7476	0.7499	0.6859	0.0795	1.7764
2019080802.0	-3.8857	71.8234	-16.4933	9.0426	1.5003	1.9042	1.5694	0.6827	0.6935	0.703	0.0685	1.5018
2019080803.0	-3.9618	72.0307	-17.6762	9.0758	1.7856	1.9858	1.7967	0.6557	0.6722	0.6267	0.1103	1.789
2019080804.0	-4.0462	72.2398	-13.7596	7.9941	1.4839	1.7378	1.378	0.5467	0.5587	0.5158	0.1228	1.489
2019080805.0	-4.136	72.4461	-12.2181	7.7464	1.2312	1.4032	1.2205	0.4599	0.4829	0.4033	0.0758	1.2335
2019080806.0	-4.2201	72.6457	-10.7309	7.4833	1.2748	1.5601	1.5399	0.4517	0.4735	0.5083	0.1036	1.279
2019080807.0	-4.3032	72.8462	-9.5557	6.2795	1.1041	1.1828	0.9666	0.3249	0.3552	0.3299	0.076	1.1067
2019080808.0	-4.3932	73.0503	-13.0021	6.4684	1.0466	1.0885	1.0308	0.3107	0.3471	0.383	0.0348	1.0472
2019080809.0	-4.4825	73.2511	-7.7583	5.3518	0.8978	1.1093	0.9599	0.2571	0.2844	0.2856	0.1087	0.9044
2019080810.0	-4.5637	73.4522	-8.2142	5.9225	0.9504	0.9952	0.8736	0.2698	0.3025	0.2673	0.0664	0.9527
2019080811.0	-4.6478	73.6538	-4.2054	3.9728	0.5999	0.6475	0.5608	0.1922	0.2171	0.1881	0.0478	0.6018
2019080812.0	-4.7617	73.8577	-3.6717	4.0761	0.5113	0.5771	0.5272	0.1823	0.2087	0.1678	0.0229	0.5118
2019080813.0	-4.8692	74.0602	-0.9875	nan	0.5462	0.6444	0.6733	0.201	0.2266	0.1944	0.0384	0.5476
2019080814.0	-4.962	74.2521	-1.7631	nan	0.4832	0.5634	0.5601	0.1595	0.184	0.148	0.0318	0.4843
2019080815.0	-5.0383	74.4382	-0.9393	3.8207	0.6172	0.7359	0.7817	0.1686	0.196	0.1596	0.0482	0.6191
2019080816.0	-5.1252	74.6298	-2.5244	2.5009	1.0761	0.878	0.983	0.1729	0.2024	0.1652	0.0569	1.0776
2019080817.0	-5.2094	74.8146	-3.5403	2.9914	0.9345	1.1431	1.0885	0.2282	0.2615	0.2153	0.0759	0.9376
2019080818.0	-5.2882	74.9823	-3.4	3.1652	1.858	2.13	1.9385	0.2741	0.3121	0.2907	0.1521	1.8643
2019080819.0	-5.3717	75.1465	-2.6012	2.0685	1.1984	1.5875	1.1157	0.2703	0.2777	0.252	0.1347	1.2059
2019080820.0	-5.4454	75.298	nan	2.3255	nan	nan	nan	nan	nan	nan	nan	nan
2019080821.0	-5.4644	75.3356	0.3094	1.849	0.8709	1.2889	0.9313	0.1847	0.1916	0.1689	0.0737	0.874
2019080822.0	-5.4645	75.3356	-1.8019	1.6838	1.3316	1.4467	1.5466	0.2297	0.2353	0.2177	0.1242	1.3374
2019080823.0	-5.4645	75.3356	nan	0.9855	nan	nan	nan	nan	nan	nan	nan	nan
2019080900.0	-5.4642	75.3356	nan	1.9695	nan	nan	nan	nan	nan	nan	nan	nan
2019080901.0	-5.4642	75.3356	-3.2426	2.6285	1.2829	1.24	1.1271	0.2223	0.2238	0.1779	0.0761	1.2851
2019080902.0	-5.4642	75.3356	nan	2.1223	nan	nan	nan	nan	nan	nan	nan	nan
2019080903.0	-5.4643	75.3356	-0.8003	0.9566	1.2857	2.1317	1.1035	0.1711	0.178	0.156	0.1332	1.2925
2019080904.0	-5.4303	75.3218	-4.1417	2.4811	1.5808	1.7204	1.3735	0.2149	0.2323	0.2384	0.14	1.5869
2019080905.0	-5.3638	75.2934	-3.6908	2.4828	1.0489	1.2614	0.864	0.192	0.2117	0.1931	0.0219	1.0491
2019080906.0	-5.2924	75.2644	-0.8513	1.0799	1.2944	1.9371	1.425	0.221	0.238	0.1865	0.1384	1.3017
2019080907.0	-5.301	75.2689	nan	1.5127	nan	nan	nan	nan	nan	nan	nan	nan
2019080908.0	-5.4583	75.3337	nan	1.9395	nan	nan	nan	nan	nan	nan	nan	nan
2019080912.0	-5.9813	75.4655	nan	nan	nan	nan	nan	nan	nan	nan	nan	nan
2019080913.0	-6.3212	75.5522	-0.9273	2.7883	1.0176	1.1095	1.2381	0.2251	0.2359	0.2297	0.0714	1.0201
2019080914.0	-6.6184	75.6386	nan	3.3254	nan	nan	nan	nan	nan	nan	nan	nan
2019080915.0	-6.6267	75.6424	-2.7596	4.3448	2.2782	2.625	2.168	0.3084	0.309	0.2582	0.1586	2.2837
2019080916.0	-6.6327	75.6441	nan	4.7051	nan	nan	nan	nan	nan	nan	nan	nan
2019080917.0	-6.7471	75.6733	-11.2133	4.9474	1.8047	3.9704	2.2718	0.323	0.3507	0.3249	0.2262	1.8188
2019080918.0	-6.9004	75.7123	-7.334	4.852	1.4674	1.7814	1.2072	0.2818	0.3097	0.2709	0.1413	1.4742
2019080919.0	-7.0481	75.7533	-7.6127	4.9927	1.8337	2.2724	2.3333	0.3251	0.3528	0.373	0.0942	1.8361
2019080920.0	-7.1984	75.7889	nan	4.3284	nan	nan	nan	nan	nan	nan	nan	nan
2019080921.0	-7.2191	75.7955	-3.9735	4.1624	2.15	2.7127	1.7165	0.381	0.384	0.3295	0.1372	2.1544
2019080922.0	-7.2191	75.7956	-4.0492	4.0998	1.4428	1.7436	1.3074	0.3737	0.3684	0.3222	0.067	1.4444
2019080923.0	-7.2191	75.7956	-10.7651	3.7402	2.2019	2.6952	2.1409	0.3782	0.3854	0.3214	0.171	2.2086
2019081000.0	-7.2192	75.7956	-9.1366	4.4984	2.3031	3.3908	2.4429	0.4381	0.4455	0.3708	0.2208	2.3137
2019081001.0	-7.2192	75.7956	-5.5004	3.8665	2.8	2.6401	2.7714	0.4253	0.4534	0.3966	0.147	2.8039
2019081002.0	-7.2191	75.7956	-2.9169	3.772	2.7433	4.3784	2.7631	0.5071	0.5068	0.4717	0.1564	2.7477
2019081003.0	-7.2191	75.7956	-2.9089	3.6705	1.9591	2.6539	1.6916	0.4195	0.4393	0.3593	0.1506	1.9649
2019081004.0	-7.1736	75.8103	-4.4477	3.9056	2.541	2.6619	2.1637	0.3817	0.4428	0.4245	0.1217	2.5439
2019081005.0	-7.0905	75.8379	-5.2518	3.5567	1.6992	2.465	1.6212	0.3177	0.3633	0.3005	0.1115	1.7029
2019081006.0	-7.005	75.8672	-5.6219	3.4479	2.0727	2.4765	2.4989	0.3308	0.3802	0.3666	0.1454	2.0778
2019081007.0	-7.0992	75.8373	nan	2.8581	nan	nan	nan	nan	nan	nan	nan	nan
2019081008.0	-7.2606	75.8201	-7.7743	3.2887	1.8518	2.7111	1.6666	0.2592	0.3079	0.2721	0.1905	1.8616
2019081009.0	-7.3564	75.8429	-3.0572	3.5643	1.4888	2.0015	1.3464	0.2615	0.3111	0.2747	0.186	1.5004
2019081010.0	-7.4588	75.8692	-6.5882	4.0748	1.6537	2.092	1.6011	0.279	0.3315	0.2788	0.1524	1.6607
2019081011.0	-7.5602	75.8925	-8.8196	4.4996	1.8564	2.1888	1.9312	0.2675	0.3129	0.2221	0.1416	1.8618
2019081012.0	-7.6354	75.9165	-12.4711	4.8858	4.2925	4.3673	3.6046	0.3448	0.3992	0.3814	0.5064	4.3222
2019081013.0	-7.6134	75.9474	nan	5.5048	nan	nan	nan	nan	nan	nan	nan	nan
2019081014.0	-7.7925	75.9503	nan	5.2095	nan	nan	nan	nan	nan	nan	nan	nan
2019081015.0	-7.8164	75.9494	-12.7075	4.8302	3.1646	3.1296	3.4049	0.4236	0.4563	0.4081	0.2428	3.1739
2019081016.0	-7.8751	75.9643	nan	4.8878	nan	nan	nan	nan	nan	nan	nan	nan
2019081017.0	-8.0912	76.0183	-24.1203	nan	2.2867	2.7198	2.2993	0.3405	0.4082	0.4425	0.0789	2.288
2019081018.0	-8.3125	76.0764	nan	nan	nan	nan	nan	nan	nan	nan	nan	nan
2019081019.0	-8.4241	76.0918	nan	nan	nan	nan	nan	nan	nan	nan	nan	nan
2019081020.0	-8.2332	76.0585	nan	nan	nan	nan	nan	nan	nan	nan	nan	nan
2019081021.0	-8.0952	76.0386	-14.9717	5.3805	1.352	2.2634	1.2516	0.3008	0.344	0.3144	0.0853	1.3547
2019081022.0	-8.1087	76.0375	-12.4192	5.342	1.8119	2.9162	1.6822	0.3603	0.4013	0.3483	0.0787	1.8136
2019081023.0	-8.1309	76.0362	-19.2046	4.6832	1.432	2.7572	1.4146	0.2714	0.3069	0.3602	0.1758	1.4427
2019081100.0	-8.1391	76.0358	-17.4347	4.9399	1.8759	2.3765	2.274	0.3035	0.3465	0.3991	0.1237	1.88
2019081101.0	-8.1479	76.0353	-12.8384	5.4668	1.9309	nan	1.9463	nan	nan	0.2747	nan	nan
2019081102.0	-8.1501	76.0352	-19.7955	5.8567	1.8135	2.3455	1.5827	0.3145	0.3749	0.3767	0.1533	1.8199
2019081103.0	-8.1504	76.0352	-16.4523	5.986	1.9115	1.5885	1.5131	0.3351	0.3806	0.4277	0.1148	1.915
2019081104.0	-8.1505	76.0351	-17.3594	5.7742	1.8359	2.413	1.7398	0.3188	0.3737	0.3929	0.1251	1.8402
2019081105.0	-8.1397	76.0346	-19.0595	5.3718	2.5432	3.109	2.813	0.4068	0.4533	0.4717	0.1992	2.551
2019081106.0	-8.02	76.0336	-21.7943	5.9674	2.6314	3.0224	2.669	0.4247	0.4789	0.4628	0.1781	2.6375
2019081107.0	-7.882	76.0311	-16.0971	5.9189	1.7492	2.1956	1.6276	0.3036	0.3572	0.3716	0.1728	1.7577
2019081108.0	-7.7472	76.027	nan	6.2115	nan	nan	nan	nan	nan	nan	nan	nan
2019081109.0	-8.0764	76.0307	nan	5.7107	nan	nan	nan	nan	nan	nan	nan	nan
2019081110.0	-8.1401	76.035	-18.3446	5.9937	2.1326	2.525	2.0831	0.4927	0.4931	0.4775	0.1305	2.1366
2019081111.0	-8.0252	76.0405	-16.9147	5.3567	1.8695	2.4103	2.0787	0.4133	0.4254	0.4101	0.1442	1.875
2019081112.0	-7.9008	76.0476	-12.2747	4.6739	2.2005	2.7925	2.3936	0.363	0.3743	0.3985	0.1064	2.203
2019081113.0	-7.7092	76.0599	nan	4.8053	nan	nan	nan	nan	nan	nan	nan	nan
2019081114.0	-7.1289	76.1117	-8.174	4.838	1.7882	1.9913	1.9577	0.4598	0.4843	0.4644	0.1436	1.7939
2019081115.0	-6.4714	76.162	-13.6743	5.5857	1.2289	1.3883	1.1622	0.3327	0.3679	0.3294	0.0419	1.2296
2019081116.0	-5.8155	76.2131	-9.0255	5.72	1.5499	1.7231	1.5184	0.4103	0.4485	0.3723	0.0851	1.5522
2019081117.0	-5.1734	76.2829	-8.6536	5.1159	1.7238	1.9735	1.9369	0.4155	0.4547	0.4274	0.0991	1.7267
2019081118.0	-4.6025	76.3758	-11.582	5.1423	1.9729	2.0711	2.2705	0.432	0.4723	0.4066	0.1017	1.9755
2019081119.0	-4.0568	76.4817	-9.9313	4.5647	1.9324	1.8544	1.6039	0.3869	0.4264	0.3713	0.0549	1.9332
2019081120.0	-3.4959	76.586	-8.5459	3.9694	1.3547	1.837	1.3302	0.3914	0.418	0.3809	0.0881	1.3576
2019081121.0	-2.9115	76.6924	-10.2783	3.7209	0.7804	0.8758	0.6846	0.2387	0.2611	0.2632	0.0529	0.7822
2019081122.0	-2.3122	76.7984	-13.4416	4.7994	1.4226	1.254	1.2938	0.3237	0.3494	0.3503	0.1158	1.4273
2019081123.0	-1.73	76.9025	-7.4231	5.1654	2.276	2.3614	1.8853	0.4228	0.4548	0.429	0.2241	2.287
2019081200.0	-1.18	77.01	-10.2493	5.6459	1.6055	1.9787	1.8361	0.4825	0.4987	0.4441	0.1545	1.6129
2019081201.0	-0.6318	77.1173	-21.3234	7.1471	2.6837	2.5634	2.973	0.6061	0.6311	0.6824	0.1675	2.6889
2019081202.0	-0.0958	77.2299	-22.5463	6.6747	2.5643	2.9638	2.1492	0.6797	0.7002	0.6142	0.1494	2.5687
2019081203.0	0.0984	77.3852	-12.7987	6.2693	3.1291	3.9232	3.9907	0.7015	0.7254	0.6346	0.3108	3.1445
2019081204.0	0.1883	77.551	-15.2934	6.5008	2.9419	3.4155	3.3483	0.6603	0.6792	0.5606	0.2407	2.9518
2019081205.0	0.2782	77.7179	-17.7989	7.0913	2.6992	3.075	2.9803	0.6986	0.6967	0.613	0.1586	2.7039
2019081206.0	0.368	77.8879	-13.8993	7.761	2.737	2.8211	2.8755	0.7046	0.7073	0.6696	0.1626	2.7418
2019081207.0	0.4556	78.0589	-19.9116	7.9231	3.3068	4.4706	3.0072	0.7345	0.7329	0.7013	0.2116	3.3136
2019081208.0	0.5516	78.2269	-14.1885	7.6739	2.0387	2.3769	2.2496	0.6361	0.6366	0.6031	0.1012	2.0412
2019081209.0	0.8474	78.3773	-20.871	7.6014	1.8561	1.889	1.8554	0.6181	0.6181	0.5536	0.097	1.8586
2019081210.0	1.3829	78.5119	-17.2042	7.2572	1.781	1.8179	1.5478	0.556	0.5683	0.5204	0.129	1.7857
2019081211.0	1.9467	78.6515	-18.1954	6.6463	1.7852	1.7517	1.5214	0.5343	0.5429	0.4422	0.0411	1.7857
2019081212.0	2.4955	78.7846	-22.7765	7.6093	3.168	3.2352	3.1892	0.65	0.6532	0.6545	0.3068	3.1828
2019081213.0	3.0193	78.9215	-23.1011	8.442	2.9845	3.7618	2.5522	0.6863	0.6894	0.7253	0.385	3.0093
2019081214.0	3.3298	78.9998	nan	8.7537	nan	nan	nan	nan	nan	nan	nan	nan
2019081215.0	3.3466	79.0128	-31.6246	9.2661	3.5238	4.7349	2.9794	0.7115	0.7229	0.6015	0.3409	3.5402
2019081216.0	3.3987	79.045	-26.8312	9.1547	4.3041	4.2392	3.4892	0.7728	0.7791	0.8195	0.2596	4.312
2019081217.0	3.4694	79.0763	-35.716	8.9656	5.9949	5.7716	6.8628	0.8991	0.9024	0.8958	0.3071	6.0028
2019081218.0	3.494	79.1034	nan	9.1238	nan	nan	nan	nan	nan	nan	nan	nan
2019081219.0	3.3439	79.0175	nan	9.1916	nan	nan	nan	nan	nan	nan	nan	nan
2019081220.0	3.3811	79.0318	-29.1904	9.9178	3.5362	3.9121	2.5409	0.7212	0.7206	0.6279	0.3058	3.5494
2019081221.0	3.4449	79.0574	nan	10.7372	nan	nan	nan	nan	nan	nan	nan	nan
2019081222.0	3.3603	79.0122	nan	10.5364	nan	nan	nan	nan	nan	nan	nan	nan
2019081223.0	3.3345	79.0041	-31.528	10.1422	3.4815	4.3383	3.1801	0.7707	0.7944	0.859	0.1867	3.4865
2019081300.0	3.3567	79.0344	-34.8078	9.9442	4.6048	4.8395	3.396	0.7785	0.7951	0.7922	0.229	4.6105
2019081301.0	3.3832	79.0654	nan	10.1563	nan	nan	nan	nan	nan	nan	nan	nan
2019081302.0	3.3686	79.0201	nan	9.7518	nan	nan	nan	nan	nan	nan	nan	nan
2019081303.0	3.3235	79.0129	-43.7896	9.3691	5.6565	6.1974	6.164	0.7204	0.7415	0.6382	0.3825	5.6694
2019081304.0	3.334	79.046	-27.939	9.9642	3.5887	4.0701	3.9407	0.7643	0.8029	0.6768	0.2995	3.6011
2019081305.0	3.3455	79.013	nan	9.4399	nan	nan	nan	nan	nan	nan	nan	nan
2019081306.0	3.3342	78.9999	-25.1125	8.8247	2.7608	3.1885	2.519	0.6061	0.6098	0.5933	0.2086	2.7687
2019081307.0	3.3339	78.9999	-19.6543	8.3414	2.2316	2.6276	2.2074	0.5401	0.5454	0.59	0.135	2.2357
2019081308.0	3.3339	78.9999	-38.2277	9.0908	3.8021	3.7904	3.3263	0.6504	0.6671	0.6788	0.297	3.8137
2019081309.0	3.3339	78.9999	-32.6162	8.7227	3.5751	3.8532	3.0402	0.5966	0.6171	0.6289	0.2197	3.5819
2019081310.0	3.3338	78.9999	-25.615	9.5206	2.6365	2.9465	2.9162	0.6409	0.6488	0.6567	0.199	2.644
2019081311.0	3.3338	78.9999	-34.1557	9.7378	3.2816	3.5773	3.0186	0.6768	0.6943	0.7357	0.1492	3.285
2019081312.0	3.3338	78.9999	-30.9852	9.1286	2.8462	2.9046	2.3601	0.603	0.6368	0.7035	0.2805	2.8599
2019081313.0	3.3338	78.9999	-29.4998	8.7608	2.6897	3.2044	2.4561	0.5886	0.6136	0.6554	0.2485	2.7012
2019081314.0	3.3338	78.9999	-23.0444	8.0969	2.0885	2.4899	1.9109	0.5669	0.5936	0.5696	0.173	2.0956
2019081315.0	3.3338	78.9999	-21.0704	7.9141	1.7389	1.8288	1.7761	0.5612	0.5763	0.5994	0.0672	1.7402
2019081316.0	3.3338	78.9999	-26.7877	8.6923	2.3791	2.5429	2.289	0.6211	0.6308	0.646	0.1327	2.3828
2019081317.0	3.3337	78.9999	-24.2085	9.2263	2.3433	2.4803	2.3354	0.663	0.6865	0.7457	0.1007	2.3455
2019081318.0	3.3338	78.9999	-36.7275	9.3965	3.4332	3.401	2.6545	0.7469	0.7754	0.7217	0.1835	3.4381
2019081319.0	3.3338	78.9999	-35.213	10.0284	3.0179	3.2413	3.6362	0.7657	0.7795	0.8066	0.1488	3.0216
2019081320.0	3.3337	78.9999	-39.8158	10.463	3.7406	4.2684	4.1121	0.8805	0.8896	0.8967	0.3207	3.7544
2019081321.0	3.3338	78.9999	-44.2391	10.8817	4.4282	4.1056	4.6819	0.9792	0.9894	1.0653	0.3012	4.4385
2019081322.0	3.3338	78.9999	-39.4738	11.5507	4.4105	4.7791	3.9647	0.9839	0.9993	0.9608	0.2457	4.4174
2019081323.0	3.3336	78.9999	-48.1643	11.5535	5.3172	4.9577	4.477	0.9224	0.9356	0.9361	0.298	5.3255
2019081400.0	3.3331	79.0	-54.9785	11.9154	5.7802	5.3037	5.1584	1.0679	1.0623	0.9881	0.1618	5.7825
2019081401.0	3.3331	79.0	-71.8044	12.5378	7.4279	7.3315	7.4257	1.1919	1.1822	1.1864	0.5696	7.4497
2019081402.0	3.3332	79.0	-53.4463	12.5882	6.4213	6.9377	6.1108	1.124	1.1385	1.2265	0.328	6.4297
2019081403.0	3.3331	79.0	-39.8182	11.8079	4.8509	4.6546	4.3544	0.981	1.0081	1.003	0.1344	4.8528
2019081404.0	3.3332	79.0	-42.5675	11.5347	5.2429	6.1613	4.8103	0.9952	1.0212	0.9817	0.3317	5.2534
2019081405.0	3.3331	79.0	-39.1102	10.9886	5.9636	5.4805	5.3372	0.9831	0.988	0.898	0.4083	5.9776
2019081406.0	3.3331	79.0	-28.4694	10.7279	4.2555	6.2132	4.9822	0.9722	0.9617	0.8752	0.3348	4.2686
2019081407.0	3.3331	79.0	-39.4353	10.6708	6.6529	5.9995	6.8663	0.9195	0.9482	0.9435	0.3448	6.6619
2019081408.0	3.3331	79.0	-30.7175	10.6268	4.1983	6.0259	4.1677	0.875	0.8852	0.8327	0.3986	4.2172
2019081409.0	3.3331	79.0	-39.2733	10.6011	5.0565	5.1149	4.698	0.8041	0.8463	0.8305	0.3332	5.0675
2019081410.0	3.3331	79.0	-29.9302	10.7874	4.3349	5.3786	3.966	0.8864	0.9235	0.936	0.2089	4.3399
2019081411.0	3.3331	79.0	-40.9275	10.6	5.3464	5.6648	4.4259	0.8365	0.8848	0.8044	0.3559	5.3582
2019081412.0	3.333	79.0	-33.5092	10.8399	4.6451	4.802	3.9583	0.8056	0.8405	0.827	0.2731	4.6531
2019081413.0	3.3331	79.0	-45.1884	10.6908	5.5382	5.762	5.5825	0.7849	0.8345	0.8336	0.2788	5.5452
2019081414.0	3.3332	79.0	-25.1729	10.4268	3.7943	5.3426	3.0237	0.7953	0.8422	0.7193	0.3113	3.8071
2019081415.0	3.2715	79.0004	nan	10.3556	nan	nan	nan	nan	nan	nan	nan	nan
2019081416.0	2.4903	78.9997	-33.6441	10.8971	3.848	5.0116	3.7845	0.7351	0.7919	0.8601	0.5589	3.8884
2019081417.0	1.6515	78.9742	nan	10.0047	nan	nan	nan	nan	nan	nan	nan	nan
2019081418.0	1.0553	78.914	nan	nan	nan	nan	nan	nan	nan	nan	nan	nan
2019081419.0	0.3092	78.8902	nan	nan	nan	nan	nan	nan	nan	nan	nan	nan
2019081420.0	-0.1264	78.9112	nan	nan	nan	nan	nan	nan	nan	nan	nan	nan
2019081421.0	-0.2949	78.9117	nan	nan	nan	nan	nan	nan	nan	nan	nan	nan
2019081422.0	-0.3171	78.8982	-14.982	nan	2.1261	9.0311	2.2019	0.7818	0.7953	0.7836	0.6249	2.216
2019081500.0	-0.3224	78.8618	-19.465	nan	2.4235	2.3892	2.3399	0.723	0.7442	0.8	0.0633	2.4243
2019081501.0	-0.35	78.8458	nan	nan	nan	nan	nan	nan	nan	nan	nan	nan
2019081502.0	-0.3748	78.8163	nan	nan	nan	nan	nan	nan	nan	nan	nan	nan
2019081503.0	-0.4286	78.7988	nan	nan	nan	nan	nan	nan	nan	nan	nan	nan
2019081504.0	-0.5035	78.7751	nan	nan	nan	nan	nan	nan	nan	nan	nan	nan
2019081505.0	-0.6795	78.7532	-15.5279	nan	2.4812	4.5906	2.5849	0.6957	0.7017	0.6698	0.3023	2.4996
2019081506.0	-0.9467	78.7287	-34.44	nan	3.0783	7.1764	5.2972	0.7213	0.7219	0.8005	0.9374	3.2178
2019081507.0	-1.2286	78.716	-24.149	nan	3.4871	3.5427	4.2745	0.6385	0.6395	0.628	0.2573	3.4966
2019081508.0	-1.5703	78.6917	-18.7045	nan	2.2622	2.2011	2.2368	0.6036	0.6199	0.6056	0.1462	2.2669
2019081509.0	-1.9134	78.6861	-12.13	nan	2.5534	1.9481	1.6612	0.6727	0.6842	0.623	0.1369	2.557
2019081510.0	-2.1703	78.6827	-23.1743	nan	5.5969	6.7124	7.0549	0.7165	0.7197	0.7589	0.9268	5.6732
2019081511.0	-2.4366	78.6667	-18.9601	nan	5.0594	5.431	6.6395	0.7508	0.7624	0.7692	0.502	5.0842
2019081512.0	-2.705	78.6437	nan	nan	nan	nan	nan	nan	nan	nan	nan	nan
2019081513.0	-2.9272	78.6112	-21.8886	nan	4.276	8.7639	4.2415	0.8398	0.8454	0.9387	1.0915	4.4131
2019081514.0	-3.1788	78.589	nan	nan	nan	nan	nan	nan	nan	nan	nan	nan
2019081515.0	-3.4282	78.5746	-6.3569	nan	3.6972	4.7879	3.9806	0.8577	0.8676	0.7959	0.2786	3.7077
2019081516.0	-3.6581	78.5457	-10.4595	nan	2.8204	4.1885	2.5028	0.8126	0.8328	0.718	0.1736	2.8258
2019081517.0	-3.9312	78.5116	nan	nan	nan	nan	nan	nan	nan	nan	nan	nan
2019081518.0	-4.2347	78.4584	nan	nan	nan	nan	nan	nan	nan	nan	nan	nan
2019081519.0	-4.5322	78.3985	nan	nan	nan	nan	nan	nan	nan	nan	nan	nan
2019081520.0	-4.6784	78.3704	nan	nan	nan	nan	nan	nan	nan	nan	nan	nan
2019081521.0	-4.6618	78.3569	-14.3753	nan	2.0144	2.0855	1.8842	0.7042	0.7309	0.6413	0.0769	2.0158
2019081522.0	-4.7018	78.3419	-19.7035	nan	2.2021	2.5926	2.4756	0.7027	0.7272	0.6672	0.1525	2.2074
2019081523.0	-4.7328	78.3279	-14.647	nan	2.2663	2.3241	2.3307	0.6784	0.715	0.6665	0.1038	2.2687
2019081600.0	-4.7592	78.3163	-16.2558	nan	2.9303	2.7631	3.7433	0.6878	0.7103	0.7022	0.2666	2.9424
2019081601.0	-4.7791	78.3035	-15.8862	nan	2.0855	2.1997	2.3198	0.6885	0.71	0.5953	0.121	2.089
2019081602.0	-4.7942	78.2916	-13.7953	nan	1.8462	1.7897	2.1717	0.6872	0.7186	0.6855	0.0717	1.8475
2019081603.0	-4.8051	78.2785	-12.2373	nan	1.8502	2.081	1.9575	0.6638	0.6846	0.5875	0.121	1.8541
2019081604.0	-4.8194	78.2646	-20.8878	nan	2.156	2.3244	2.1039	0.6795	0.7257	0.6462	0.145	2.1608
2019081605.0	-4.8574	78.254	-15.1317	nan	2.2945	2.7002	2.4942	0.6764	0.7211	0.6345	0.1974	2.303
2019081606.0	-4.8096	78.2408	nan	nan	nan	nan	nan	nan	nan	nan	nan	nan
2019081607.0	-4.6019	78.2053	nan	nan	nan	nan	nan	nan	nan	nan	nan	nan
2019081608.0	-4.3673	78.1736	nan	nan	nan	nan	nan	nan	nan	nan	nan	nan
2019081609.0	-4.1294	78.1417	nan	nan	nan	nan	nan	nan	nan	nan	nan	nan
2019081610.0	-3.8732	78.1062	nan	nan	nan	nan	nan	nan	nan	nan	nan	nan
2019081611.0	-3.6031	78.0242	nan	nan	nan	nan	nan	nan	nan	nan	nan	nan
2019081612.0	-2.8806	78.0092	nan	nan	nan	nan	nan	nan	nan	nan	nan	nan
2019081613.0	-2.2593	78.0501	-22.7427	nan	5.0797	6.3132	5.3207	1.0794	1.1039	1.0043	0.4062	5.0959
2019081614.0	-1.8604	78.0964	-42.9831	nan	6.6359	9.8676	8.5359	1.0919	1.117	1.105	0.5455	6.6583
2019081615.0	-1.4507	78.1421	-37.9149	nan	5.2606	6.0524	4.4141	1.2834	1.3055	1.116	0.2474	5.2664
2019081616.0	-1.01	78.1807	-31.6615	nan	5.8613	5.061	5.4378	1.385	1.4321	1.3831	0.2735	5.8677
2019081617.0	-0.5705	78.217	-47.4999	nan	6.0732	11.3802	8.3083	1.497	1.5261	1.658	0.7129	6.1149
2019081618.0	-0.1261	78.2531	-57.4303	nan	nan	11.9538	8.305	1.5217	1.5764	1.6612	1.1894	nan
2019081619.0	0.3249	78.2899	-39.2444	12.0456	6.4794	8.0332	6.1257	1.4863	1.5386	1.4844	0.453	6.4952
2019081620.0	0.6122	78.3162	nan	10.4871	nan	nan	nan	nan	nan	nan	nan	nan
2019081621.0	0.6162	78.3171	-24.9922	9.648	4.5529	5.0698	3.9375	0.7992	0.8246	0.818	0.3891	4.5695
2019081622.0	0.6161	78.3171	-27.8595	9.6921	4.4967	5.785	4.0098	0.7576	0.7857	0.7478	0.2201	4.5021
2019081623.0	0.6161	78.3171	-32.3184	9.1973	4.4868	5.1641	3.3208	0.7751	0.7976	0.8456	0.2886	4.4961
2019081700.0	0.6161	78.3171	-26.021	9.0468	3.9487	4.8086	3.8068	0.7469	0.7687	0.7776	0.2568	3.957
2019081701.0	0.6161	78.3171	-25.1429	9.8295	3.7979	3.9286	3.2996	0.7337	0.7562	0.6903	0.2327	3.805
2019081702.0	0.6156	78.3175	-16.8426	9.5316	3.0874	3.9288	3.0299	0.6999	0.7424	0.6912	0.1403	3.0905
2019081703.0	0.5733	78.3375	-16.5073	8.8284	3.3922	3.7042	3.5923	0.7087	0.7541	0.6797	0.1554	3.3957
2019081704.0	0.4932	78.3675	-8.7705	8.3009	4.1151	4.7617	4.897	0.6396	0.6821	0.6456	0.3252	4.1279
2019081705.0	0.4149	78.3947	nan	8.0881	nan	nan	nan	nan	nan	nan	nan	nan
2019081706.0	0.5943	78.333	nan	8.0708	nan	nan	nan	nan	nan	nan	nan	nan
2019081707.0	0.6056	78.3201	-14.3199	8.6224	3.2891	4.4405	3.2605	0.7117	0.7391	0.6545	0.2113	3.2959
2019081708.0	0.5312	78.3448	-19.4201	8.7509	3.773	4.0684	5.0864	0.732	0.7597	0.6692	0.2616	3.7821
2019081709.0	0.4318	78.3723	-18.6784	8.5177	3.15	5.5992	3.0257	0.764	0.7716	0.7543	0.3288	3.1671
2019081710.0	0.353	78.4036	nan	8.5083	nan	nan	nan	nan	nan	nan	nan	nan
2019081711.0	0.6712	78.4892	-19.0313	8.7387	4.2651	4.7613	5.0598	0.9514	0.9739	1.0216	0.3664	4.2808
2019081712.0	1.2638	78.6108	-24.3176	8.6287	5.9538	6.2518	6.5599	0.92	0.9536	1.0566	0.7006	5.9949
2019081713.0	1.8646	78.729	-26.4143	8.0418	8.2585	11.7473	11.5984	0.8454	0.8739	1.0362	1.4767	8.3895
2019081714.0	2.4484	78.8449	-50.2748	8.0013	7.6756	9.4894	7.3643	0.851	0.8794	0.9904	0.9681	7.7364
2019081715.0	2.9372	78.9345	-11.1549	7.9349	3.7409	5.4912	4.7061	0.7991	0.8273	0.7819	0.3824	3.7604
2019081716.0	3.4026	79.0175	-11.9141	8.1435	3.0555	4.2095	2.9649	0.8092	0.8383	0.7766	0.2165	3.0632
2019081717.0	3.9318	79.1032	nan	8.026	nan	nan	nan	nan	nan	nan	nan	nan
2019081718.0	4.5839	79.2098	-22.9971	8.0415	4.626	5.156	5.1136	0.8338	0.8621	0.8239	0.3099	4.6363
2019081719.0	5.0768	79.3102	nan	7.3984	nan	nan	nan	nan	nan	nan	nan	nan
2019081720.0	5.1671	79.3332	2.3057	7.011	7.5584	14.9684	17.671	0.7154	0.7433	1.0	2.305	7.902
2019081721.0	5.1672	79.3332	-16.8409	6.4599	6.0329	6.17	6.4752	0.6784	0.6907	0.6783	0.5665	6.0594
2019081722.0	5.1672	79.3332	-13.5352	5.8342	5.8469	6.9717	6.0581	0.7606	0.7686	0.7046	0.4944	5.8678
2019081723.0	5.1672	79.3332	-6.5145	5.4387	3.6631	4.8754	4.1033	0.6719	0.682	0.648	0.2825	3.674
2019081800.0	5.1672	79.3332	-20.8945	5.5833	5.183	5.8859	5.6393	0.7479	0.7639	0.6726	0.3226	5.193
2019081801.0	5.1672	79.3332	-14.8681	5.0648	4.453	4.8438	4.1866	0.7231	0.7354	0.5737	0.1693	4.4562
2019081802.0	5.1582	79.335	3.7421	5.4552	5.3457	6.0082	5.1615	0.6742	0.689	0.7074	0.6597	5.3862
2019081803.0	5.0604	79.3545	-13.9186	4.816	4.3103	4.8241	5.0327	0.6337	0.6602	0.5684	0.3416	4.3239
2019081804.0	4.9137	79.372	-18.9585	4.7543	4.2731	4.2364	3.8865	0.6039	0.6545	0.6114	0.2314	4.2794
2019081805.0	4.9242	79.3608	nan	4.4342	nan	nan	nan	nan	nan	nan	nan	nan
2019081806.0	5.1571	79.334	-6.0735	4.2491	3.5309	4.7173	4.3259	0.5656	0.587	0.5288	0.3773	3.551
2019081807.0	5.0395	79.3502	-2.6508	4.0493	4.2318	4.9084	4.055	0.6329	0.7287	0.6683	0.3953	4.2503
2019081808.0	4.887	79.3672	-11.4165	3.6537	2.9486	3.4598	2.6856	0.5268	0.605	0.4972	0.2077	2.9559
2019081809.0	4.7986	79.3691	nan	5.5033	nan	nan	nan	nan	nan	nan	nan	nan
2019081810.0	5.1283	79.3403	nan	2.4864	nan	nan	nan	nan	nan	nan	nan	nan
2019081811.0	4.9863	79.358	-7.6614	3.8811	2.5289	3.5284	2.1304	0.5493	0.5927	0.5091	0.0683	2.5298
2019081812.0	4.8504	79.3687	-6.588	4.7625	2.7709	3.4236	3.2205	0.5946	0.6188	0.5491	0.1967	2.7779
2019081813.0	4.8729	79.3742	nan	4.2792	nan	nan	nan	nan	nan	nan	nan	nan
2019081814.0	5.1592	79.4107	-5.3611	3.7761	2.5508	2.9684	2.4567	0.5482	0.5699	0.4905	0.1834	2.5574
2019081815.0	5.5377	79.4543	-6.3941	4.423	3.3854	4.6486	2.8466	0.5991	0.6235	0.559	0.2951	3.3983
2019081816.0	5.918	79.499	-9.8823	3.9565	2.5322	2.9512	2.4416	0.4924	0.5141	0.4621	0.0893	2.5338
2019081817.0	6.4208	79.5571	-5.0055	4.2019	2.0735	3.3011	1.9593	0.5482	0.57	0.5167	0.1766	2.081
2019081818.0	6.968	79.6253	-6.5777	4.6477	2.5852	3.3567	2.5378	0.6101	0.6373	0.5035	0.1754	2.5911
2019081819.0	7.3099	79.6639	nan	4.1136	nan	nan	nan	nan	nan	nan	nan	nan
2019081820.0	7.3313	79.6408	nan	3.7275	nan	nan	nan	nan	nan	nan	nan	nan
2019081821.0	7.3329	79.5999	nan	2.3665	nan	nan	nan	nan	nan	nan	nan	nan
2019081822.0	7.3306	79.5999	-2.5072	2.2927	3.3742	4.142	3.4762	0.444	0.4539	0.4232	0.2642	3.3846
2019081823.0	7.3322	79.5999	nan	2.3887	nan	nan	nan	nan	nan	nan	nan	nan
2019081900.0	7.3277	79.5973	nan	3.3822	nan	nan	nan	nan	nan	nan	nan	nan
2019081901.0	7.2761	79.5699	0.5796	2.4044	2.49	3.6392	2.0511	0.3939	0.4166	0.3643	0.2006	2.498
2019081902.0	7.2268	79.5374	nan	1.2095	nan	nan	nan	nan	nan	nan	nan	nan
2019081903.0	7.2569	79.5497	nan	1.9247	nan	nan	nan	nan	nan	nan	nan	nan
2019081904.0	7.3305	79.6002	nan	1.6701	nan	nan	nan	nan	nan	nan	nan	nan
2019081905.0	7.3286	79.5994	nan	1.674	nan	nan	nan	nan	nan	nan	nan	nan
2019081906.0	7.254	79.5797	nan	0.8732	nan	nan	nan	nan	nan	nan	nan	nan
2019081907.0	7.1486	79.5547	nan	1.6654	nan	nan	nan	nan	nan	nan	nan	nan
2019081908.0	6.6238	79.5029	nan	2.2806	nan	nan	nan	nan	nan	nan	nan	nan
2019081909.0	6.0391	79.4688	nan	1.3328	nan	nan	nan	nan	nan	nan	nan	nan
2019081910.0	5.9954	79.4692	nan	1.5192	nan	nan	nan	nan	nan	nan	nan	nan
2019081911.0	5.9954	79.4692	nan	2.3876	nan	nan	nan	nan	nan	nan	nan	nan
2019081912.0	5.9954	79.4692	nan	1.6972	nan	nan	nan	nan	nan	nan	nan	nan
2019081913.0	5.9954	79.4692	nan	1.7293	nan	nan	nan	nan	nan	nan	nan	nan
2019081914.0	6.113	79.4768	nan	1.7529	nan	nan	nan	nan	nan	nan	nan	nan
2019081915.0	6.6797	79.5078	0.0036	1.5335	2.0257	1.893	2.2698	0.3506	0.3689	0.3545	0.152	2.0314
2019081916.0	7.3707	79.5489	-11.9089	2.6524	3.5418	4.1882	2.9828	0.3971	0.4214	0.4343	0.6618	3.6031
2019081917.0	8.0075	79.6125	-6.6687	3.8311	1.6579	1.9987	1.7997	0.3958	0.4156	0.3287	0.1424	1.664
2019081918.0	8.5847	79.6963	-17.1969	4.7481	2.563	2.8509	2.541	0.4351	0.4664	0.4688	0.2777	2.578
2019081919.0	9.1883	79.739	nan	5.3748	nan	nan	nan	nan	nan	nan	nan	nan
2019081920.0	9.3609	79.687	nan	5.5303	nan	nan	nan	nan	nan	nan	nan	nan
2019081921.0	9.3996	79.6666	-15.3201	6.5451	2.8431	3.8657	2.9683	0.3905	0.4108	0.377	0.3373	2.863
2019081922.0	9.3996	79.6666	-13.3117	7.1122	4.2809	4.5336	5.7127	0.4215	0.4323	0.464	0.5491	4.316
2019081923.0	9.3996	79.6666	-14.133	7.2754	3.2372	3.5768	3.233	0.4552	0.4745	0.4476	0.2692	3.2483
2019082000.0	9.3546	79.6704	nan	6.7791	nan	nan	nan	nan	nan	nan	nan	nan
2019082001.0	9.3057	79.6747	nan	7.7255	nan	nan	nan	nan	nan	nan	nan	nan
2019082002.0	9.3998	79.6669	nan	8.0026	nan	nan	nan	nan	nan	nan	nan	nan
2019082003.0	9.4002	79.6669	-42.2249	9.3237	6.6595	6.5708	7.5926	0.7634	0.7807	0.9175	0.4642	6.6757
2019082004.0	9.4001	79.667	-58.0568	10.4599	6.2506	7.666	6.6721	0.9366	0.9534	0.9094	0.6821	6.2877
2019082005.0	9.4002	79.6669	-43.5712	12.3555	7.0816	7.7974	8.2283	1.0551	1.0623	1.2224	0.6928	7.1154
2019082006.0	9.4001	79.6664	nan	12.8307	nan	nan	nan	nan	nan	nan	nan	nan
2019082007.0	9.2507	79.6384	nan	13.2076	nan	nan	nan	nan	nan	nan	nan	nan
2019082008.0	9.3202	79.67	nan	13.2222	nan	nan	nan	nan	nan	nan	nan	nan
2019082009.0	9.1442	79.7788	nan	11.2423	nan	nan	nan	nan	nan	nan	nan	nan
2019082010.0	9.0241	79.8258	-45.1615	nan	3.6922	3.6879	2.9674	1.0485	1.0688	0.9546	0.182	3.6967
2019082011.0	8.9742	79.8706	nan	nan	nan	nan	nan	nan	nan	nan	nan	nan
2019082012.0	8.8915	79.9041	nan	nan	nan	nan	nan	nan	nan	nan	nan	nan
2019082013.0	8.8574	79.9207	-24.407	nan	3.1504	3.4775	3.0492	0.8724	0.883	0.8465	0.2093	3.1574
2019082014.0	8.7466	79.9247	-27.4394	nan	3.6381	4.3292	3.4218	0.9013	0.9304	1.0437	0.431	3.6635
2019082015.0	8.6685	79.9287	-29.7997	nan	3.5748	3.9395	3.6671	0.8224	0.8336	0.7992	0.2838	3.5861
2019082016.0	8.6167	79.9347	-27.2264	nan	3.0518	3.7162	3.0052	0.8112	0.8165	0.9398	0.2848	3.065
2019082017.0	8.698	79.928	nan	nan	nan	nan	nan	nan	nan	nan	nan	nan
2019082018.0	8.4518	79.779	nan	11.6574	nan	nan	nan	nan	nan	nan	nan	nan
2019082020.0	7.2508	79.3923	nan	13.4697	nan	nan	nan	nan	nan	nan	nan	nan
2019082021.0	6.6991	79.2047	nan	13.834	nan	nan	nan	nan	nan	nan	nan	nan
2019082022.0	6.6	79.1666	-38.1745	13.9421	4.7674	5.5698	3.8834	1.1582	1.1999	1.1376	0.287	4.776
2019082023.0	6.6002	79.1666	-33.8079	13.8036	5.6776	6.2827	5.1647	1.1004	1.1511	1.0896	0.304	5.6858
2019082100.0	6.6001	79.1666	-38.1515	13.0236	4.9556	6.0236	4.4144	0.9994	1.0563	0.9198	0.4205	4.9734
2019082101.0	6.6001	79.1666	-30.1776	12.267	3.6145	4.2895	3.6813	0.9094	0.9574	0.9149	0.3384	3.6303
2019082102.0	6.6001	79.1666	-28.0876	11.5903	3.5903	3.7388	3.8412	0.8705	0.8946	0.9166	0.296	3.6025
2019082103.0	6.6001	79.1666	-27.6432	11.1779	3.6233	4.7357	3.623	0.8293	0.8593	0.8123	0.2597	3.6326
2019082104.0	6.6001	79.1666	-30.7785	10.6084	4.3805	4.6609	4.2514	0.8812	0.9167	0.8309	nan	nan
2019082105.0	6.6001	79.1666	-33.5551	10.3135	4.4395	5.1673	3.7598	0.8519	0.8803	0.8528	0.3127	4.4505
2019082106.0	6.6001	79.1666	-21.9913	9.7912	3.8574	3.8968	4.9111	0.8046	0.8405	0.7312	0.0981	3.8586
2019082107.0	6.6	79.1666	-23.7355	9.1323	3.6881	4.5203	3.1167	0.7944	0.8269	0.7554	0.075	3.6889
2019082108.0	6.6001	79.1666	-27.673	8.9944	5.0028	6.2043	5.3118	0.8197	0.8521	0.8786	0.3264	5.0135
2019082109.0	6.6001	79.1666	-20.9503	8.9645	4.3353	5.1036	4.8058	0.7211	0.7447	0.7425	0.1983	4.3399
2019082110.0	6.6001	79.1666	-18.2852	8.2629	4.2995	4.8897	4.215	0.7106	0.7295	0.74	0.2534	4.3069
2019082111.0	6.6001	79.1666	-16.7108	7.7397	3.9308	5.1427	3.8616	0.7027	0.7301	0.6892	0.3589	3.9472
2019082112.0	6.6	79.1666	-15.9161	7.0433	3.1155	3.5051	3.6834	0.6465	0.667	0.6176	0.0858	3.1166
2019082113.0	6.6	79.1666	-9.3343	6.6731	4.54	5.2462	4.4697	0.6834	0.7102	0.693	0.3309	4.5521
2019082114.0	6.6	79.1666	-13.7214	6.3818	2.3741	3.4983	2.9567	0.6272	0.6608	0.5657	0.1305	2.3776
2019082115.0	6.6	79.1666	-18.4826	6.2207	3.5554	4.5742	3.3455	0.6333	0.6469	0.6391	0.3999	3.5779
2019082116.0	6.6	79.1666	-12.985	6.0449	3.1091	3.6856	3.4864	0.6651	0.6747	0.6515	0.1082	3.111
2019082117.0	6.6	79.1666	-6.5621	5.5431	2.9094	3.7776	3.6186	0.6611	0.6713	0.5821	0.2136	2.9172
2019082118.0	6.6001	79.1666	-10.4108	5.2424	3.2225	3.2765	2.3501	0.6586	0.6726	0.6062	0.0998	3.2241
2019082119.0	6.6001	79.1666	-8.5954	5.3336	2.7729	2.887	4.1692	0.652	0.658	0.5764	0.0786	2.7741
2019082120.0	6.6001	79.1666	-9.0241	5.2867	2.9645	4.0466	3.3261	0.6645	0.6725	0.6799	0.2989	2.9796
2019082121.0	6.6001	79.1666	0.699	4.6129	3.5173	3.5794	3.4369	0.6552	0.6593	0.5871	0.2281	3.5246
2019082122.0	6.6001	79.1666	-2.644	4.3068	2.8868	2.9847	2.4545	0.6227	0.6252	0.575	0.1223	2.8894
2019082123.0	6.6001	79.1666	-1.1623	4.2697	3.3008	3.941	3.2693	0.6805	0.6857	0.5942	0.1751	3.3054
2019082200.0	6.6	79.1666	-4.8851	3.8179	3.3573	3.403	3.8017	0.6657	0.6692	0.6038	0.1778	3.3621
2019082201.0	6.6001	79.1666	1.1779	3.9775	3.5433	4.5004	3.7463	0.5544	0.5898	0.5325	0.2361	3.5511
2019082202.0	6.6	79.1666	-4.8436	4.1059	2.9836	3.582	3.8865	0.6268	0.6261	0.5384	0.2256	2.9922
2019082203.0	6.6	79.1666	-8.2293	3.5264	3.5095	3.7134	3.2406	0.6289	0.6355	0.5335	0.1875	3.5146
2019082204.0	6.6	79.1666	-5.3371	3.3173	3.807	4.4188	4.5722	0.6092	0.6299	0.5542	0.2112	3.8129
2019082205.0	6.6	79.1666	-5.6482	3.559	4.4317	4.9295	5.1801	0.6773	0.6768	0.6274	0.3114	4.4426
2019082206.0	6.6	79.1666	-4.6548	3.563	3.9782	5.1343	4.0591	0.6461	0.6543	0.5474	0.4337	4.0017
2019082207.0	6.6	79.1666	-5.1973	3.012	4.2638	4.2529	3.9662	0.6531	0.6517	0.6285	0.2835	4.2733
2019082208.0	6.6	79.1666	1.9437	3.123	4.6653	6.9006	5.5666	0.5999	0.6165	0.5154	0.3895	4.6816
2019082209.0	6.6	79.1666	nan	3.3087	nan	nan	nan	nan	nan	nan	nan	nan
2019082210.0	6.6	79.1666	2.8251	3.1979	4.2417	6.1405	4.3125	0.651	0.6874	0.5608	0.2322	4.248
2019082211.0	6.6	79.1666	-3.5581	2.5349	3.4672	6.6918	3.8349	0.5982	0.6175	0.4944	0.3885	3.4889
2019082212.0	6.5999	79.1666	-10.4608	2.8598	2.8929	4.7028	2.6618	0.6355	0.6474	0.5378	0.1455	2.8966
2019082213.0	6.6	79.1666	1.9277	3.3459	3.5018	3.9883	4.4877	0.5784	0.578	0.5152	0.2009	3.5076
2019082214.0	6.6	79.1666	-4.5184	3.5015	4.6582	7.6769	4.5958	0.6424	0.6579	0.6333	0.3927	4.6747
2019082215.0	6.6	79.1666	-9.0895	3.0231	4.2528	4.6616	4.0764	0.6687	0.6777	0.6759	0.1506	4.2554
2019082216.0	6.6	79.1666	-0.1321	2.6312	3.7036	6.5354	4.6914	0.5424	0.582	0.5061	0.4198	3.7273
2019082217.0	6.6	79.1666	-0.7643	3.4869	3.9881	4.9387	4.5826	0.5978	0.6398	0.5745	0.3155	4.0006
2019082218.0	6.5999	79.1665	nan	2.6489	nan	nan	nan	nan	nan	nan	nan	nan
2019082219.0	6.6001	79.1665	nan	2.441	nan	nan	nan	nan	nan	nan	nan	nan
2019082220.0	6.6001	79.1665	nan	2.4425	nan	nan	nan	nan	nan	nan	nan	nan
2019082221.0	6.5998	79.1665	3.2896	2.1655	5.0373	9.0359	5.5529	0.6541	0.676	0.5672	0.6376	5.0775
2019082222.0	6.5997	79.1665	-8.4207	2.3942	3.3185	5.2015	3.0339	0.5276	0.5301	0.4682	0.1991	3.3245
2019082223.0	6.5998	79.1665	-1.1459	3.0807	4.909	5.6063	6.7959	0.635	0.6693	0.5269	0.4092	4.926
2019082300.0	6.5998	79.1666	-4.0132	2.6041	3.2476	4.133	4.0945	0.5803	0.5905	0.4703	0.2971	3.2611
2019082301.0	6.5998	79.1665	-12.273	2.8333	4.5174	5.4653	3.82	0.616	0.6519	0.5584	0.3718	4.5327
2019082302.0	6.5998	79.1666	-7.0679	2.3566	2.884	3.6441	2.6191	0.5251	0.5598	0.5118	0.2589	2.8956
2019082303.0	6.6599	79.168	nan	2.8544	nan	nan	nan	nan	nan	nan	nan	nan
2019082304.0	6.8337	79.1732	-12.2515	2.0078	4.4035	5.4031	4.234	0.5388	0.5528	0.5237	0.4154	4.423
2019082305.0	7.0138	79.1774	2.3188	2.9919	4.0717	5.7276	4.3592	0.5815	0.5976	0.5666	0.2541	4.0796
2019082306.0	7.0653	79.1796	nan	2.5775	nan	nan	nan	nan	nan	nan	nan	nan
2019082307.0	6.63	79.1675	nan	2.258	nan	nan	nan	nan	nan	nan	nan	nan
2019082308.0	6.6408	79.1661	nan	2.0453	nan	nan	nan	nan	nan	nan	nan	nan
2019082309.0	6.8093	79.1634	nan	2.8637	nan	nan	nan	nan	nan	nan	nan	nan
2019082310.0	6.9857	79.1613	nan	2.3472	nan	nan	nan	nan	nan	nan	nan	nan
2019082311.0	7.1212	79.1616	nan	2.8386	nan	nan	nan	nan	nan	nan	nan	nan
2019082312.0	6.5578	79.1761	-3.567	2.61	2.5281	3.1499	3.1963	0.5051	0.5598	0.4853	0.1995	2.536
2019082313.0	5.6812	79.1985	0.7272	2.442	2.7037	3.0875	3.0956	0.4705	0.5105	0.4311	0.2819	2.7184
2019082314.0	4.8421	79.2288	-4.1077	2.6626	2.0286	2.3932	1.7587	0.5247	0.5516	0.4121	0.0383	2.0289
2019082315.0	3.9988	79.2627	-7.2839	2.8932	2.7716	2.514	2.6772	0.4863	0.5178	0.4857	0.1891	2.778
2019082316.0	3.1543	79.2921	nan	4.2646	nan	nan	nan	nan	nan	nan	nan	nan
2019082317.0	2.6688	79.3008	nan	5.0572	nan	nan	nan	nan	nan	nan	nan	nan
2019082318.0	2.6493	79.3169	-4.5126	4.5886	1.2353	1.8358	1.1754	0.2715	0.2909	0.244	0.0696	1.2372
2019082319.0	2.6493	79.3169	-5.2063	3.936	1.5658	1.4248	1.7494	0.2799	0.2927	0.2958	0.091	1.5684
2019082320.0	2.6493	79.3169	-12.8334	4.8035	2.2416	2.9929	2.0903	0.3144	0.3328	0.3412	0.2294	2.2533
2019082321.0	2.6493	79.3169	-6.0536	4.941	2.0997	2.4962	2.4146	0.3366	0.3438	0.3564	0.2146	2.1107
2019082322.0	2.6493	79.3169	-12.1578	5.4544	2.1685	2.3756	2.1134	0.3871	0.4034	0.3562	0.0887	2.1703
2019082323.0	2.6493	79.3169	-6.8896	5.7506	2.0113	2.0297	2.1276	0.3768	0.3832	0.3028	0.1243	2.0151
2019082400.0	2.6492	79.3169	-10.6446	5.2396	2.0677	2.8572	1.7868	0.3386	0.3442	0.3264	0.205	2.0778
2019082401.0	2.6491	79.3169	-13.0898	5.8981	1.9641	2.0563	1.7086	0.4091	0.4113	0.3985	0.1301	1.9684
2019082402.0	2.6491	79.317	-15.1762	6.0871	2.605	2.3856	2.0674	0.444	0.4607	0.3502	0.1212	2.6078
2019082403.0	2.6491	79.3169	-14.1528	5.8297	2.5158	3.3536	2.8377	0.3942	0.4285	0.3794	0.2966	2.5332
2019082404.0	2.6491	79.3169	-28.4612	5.8766	6.9499	6.0056	6.1499	0.4647	0.4789	0.5446	0.7805	6.9936
2019082405.0	2.6491	79.3169	-19.5483	6.8165	2.8981	3.7411	2.9596	0.5168	0.5389	0.4826	0.3556	2.9198
2019082406.0	2.6461	79.3164	-19.5048	6.8353	3.4803	3.8964	3.3883	0.5247	0.5375	0.5556	0.3934	3.5025
2019082407.0	2.5596	79.3013	-11.8164	6.5419	3.5452	4.6401	3.2985	0.5607	0.5851	0.5436	0.3382	3.5613
2019082408.0	2.4277	79.2807	-16.6567	6.8755	2.7095	3.5992	2.833	0.5111	0.5396	0.5267	0.3068	2.7268
2019082409.0	2.3084	79.268	nan	7.502	nan	nan	nan	nan	nan	nan	nan	nan
2019082410.0	2.6289	79.314	nan	7.306	nan	nan	nan	nan	nan	nan	nan	nan
2019082411.0	2.6397	79.3062	-25.61	7.5634	3.6986	4.138	4.2119	0.5598	0.5946	0.5223	0.2995	3.7107
2019082412.0	2.5991	79.2749	-26.49	8.2156	4.4555	5.2104	4.6788	0.6153	0.6455	0.6142	0.3701	4.4708
2019082413.0	2.5544	79.2434	nan	8.5583	nan	nan	nan	nan	nan	nan	nan	nan
2019082414.0	2.6143	79.2974	nan	7.3782	nan	nan	nan	nan	nan	nan	nan	nan
2019082415.0	2.6504	79.3168	-31.0174	8.0375	4.4298	5.211	3.9384	0.6364	0.6592	0.6364	0.2565	4.4372
2019082416.0	2.6503	79.3168	-34.3768	8.0469	4.5111	4.2568	3.1702	0.576	0.6048	0.6102	0.3325	4.5234
2019082417.0	2.6504	79.3167	-22.0176	8.2652	2.6816	3.0995	2.4548	0.5813	0.6031	0.5424	0.108	2.6838
2019082418.0	2.6549	79.316	nan	8.4009	nan	nan	nan	nan	nan	nan	nan	nan
2019082419.0	3.159	79.2179	-27.1254	9.6328	2.6375	4.6339	2.4436	0.544	0.6107	0.5961	0.2196	2.6466
2019082420.0	4.0087	79.045	-22.2867	9.5266	2.126	2.4765	1.9676	0.5832	0.6464	0.5987	0.2104	2.1364
2019082421.0	4.8584	78.8709	-25.0846	9.2794	2.7374	2.6278	2.776	0.5899	0.654	0.7026	0.2021	2.7448
2019082422.0	5.6624	78.6944	-12.8191	8.6832	2.5779	2.6333	2.7267	0.5262	0.5961	0.612	0.2219	2.5874
2019082423.0	6.5076	78.5232	-12.8721	6.679	1.8897	1.9525	1.6455	0.4392	0.4992	0.4846	0.1807	1.8984
2019082500.0	6.9935	78.4186	nan	7.0553	nan	nan	nan	nan	nan	nan	nan	nan
2019082501.0	6.9999	78.4166	-15.322	7.2442	2.3713	1.9727	2.4869	0.4466	0.4737	0.4138	0.0549	2.3719
2019082502.0	7.0	78.4166	-13.4261	6.5283	2.475	2.831	2.3033	0.3906	0.427	0.4196	0.2334	2.486
2019082503.0	6.9999	78.4166	-15.5191	6.4595	3.5147	3.2945	2.3182	0.45	0.4762	0.5204	0.373	3.5344
2019082504.0	6.9999	78.4166	-16.044	8.0245	2.2408	3.265	2.1122	0.5429	0.5458	0.4928	0.2319	2.2528
2019082505.0	6.9912	78.414	-20.1326	9.1888	2.6956	2.7236	2.6786	0.5852	0.6083	0.6089	0.1185	2.6982
2019082506.0	6.9245	78.3876	-19.9149	7.5946	3.5107	3.7328	2.976	0.5099	0.5506	0.5336	0.2913	3.5227
2019082507.0	6.857	78.3559	-10.7801	6.7556	1.8458	1.9557	2.4797	0.4012	0.4335	0.4236	0.173	1.8539
2019082508.0	6.8625	78.3505	nan	7.8428	nan	nan	nan	nan	nan	nan	nan	nan
2019082509.0	7.0012	78.4173	nan	6.518	nan	nan	nan	nan	nan	nan	nan	nan
2019082510.0	6.9648	78.4052	nan	5.6333	nan	nan	nan	nan	nan	nan	nan	nan
2019082511.0	6.874	78.3758	-7.0807	5.4729	1.3273	1.5519	1.2212	0.3544	0.372	0.341	0.1099	1.3319
2019082512.0	6.7977	78.3362	-8.3496	7.3749	4.3381	4.7968	3.9482	0.5349	0.5779	0.7201	0.7195	4.3974
2019082513.0	6.8873	78.368	nan	7.0833	nan	nan	nan	nan	nan	nan	nan	nan
2019082514.0	7.0	78.4169	-26.3145	7.8986	3.7407	4.1476	2.6642	0.5516	0.5888	0.5428	0.2999	3.7527
2019082515.0	7.0	78.4169	-19.8751	7.9909	2.8648	3.5552	2.5739	0.5791	0.6106	0.5729	0.1877	2.871
2019082516.0	7.0	78.4169	-28.1916	8.2732	4.1978	4.2343	4.9039	0.559	0.6044	0.6255	0.4452	4.2214
2019082517.0	7.0001	78.4169	-19.988	7.8871	2.339	3.1305	1.9621	0.4749	0.5226	0.4892	0.1884	2.3466
2019082518.0	7.0755	78.3459	nan	6.5771	nan	nan	nan	nan	nan	nan	nan	nan
2019082519.0	7.2786	78.1178	-7.4339	4.2249	1.0663	1.3937	1.0673	0.3567	0.3871	0.3526	0.0881	1.0699
2019082520.0	7.4682	77.8865	-11.1433	4.8381	2.1794	1.7547	1.6227	0.3877	0.415	0.4297	0.1182	2.1826
2019082521.0	7.5821	77.7238	nan	4.7967	nan	nan	nan	nan	nan	nan	nan	nan
2019082522.0	7.5831	77.7167	-6.6609	3.9845	1.8791	1.9909	2.0436	0.2679	0.3037	0.2389	0.1199	1.883
2019082523.0	7.5831	77.7167	-3.3987	2.2473	1.3296	1.7617	1.5855	0.2004	0.228	0.1883	0.0769	1.3318
2019082600.0	7.5831	77.7167	-12.2929	4.5725	2.7067	2.8704	3.3451	0.2549	0.2895	0.3106	0.3076	2.7242
2019082601.0	7.5831	77.7167	-4.7065	4.6457	1.2845	1.5227	1.1549	0.2453	0.2804	0.2459	0.0552	1.2856
2019082602.0	7.5831	77.7167	-7.1678	5.0822	1.8789	2.6091	1.6939	0.2706	0.3072	0.2704	0.1626	1.886
2019082603.0	7.5685	77.7131	-8.5158	5.0651	1.8375	2.1832	1.7893	0.2752	0.314	0.2854	0.1244	1.8417
2019082604.0	7.4836	77.6889	-5.1694	4.6261	1.4428	1.7604	1.5537	0.2616	0.2992	0.2818	0.1445	1.45
2019082605.0	7.4097	77.6589	-6.8322	4.6139	1.734	2.3164	1.308	0.2525	0.2879	0.2398	0.1448	1.7401
2019082606.0	7.4443	77.6621	nan	4.3214	nan	nan	nan	nan	nan	nan	nan	nan
2019082607.0	7.5166	77.7037	-6.8899	4.6376	2.2617	1.9546	1.9073	0.2749	0.3182	0.268	0.1455	2.2664
2019082608.0	7.403	77.6743	-2.6573	5.5682	2.7385	4.4202	3.1281	0.3347	0.3809	0.3505	0.3443	2.76
2019082609.0	7.2988	77.6429	-7.3321	5.7954	1.4818	1.6577	1.8596	0.2741	0.3152	0.264	0.082	1.4841
2019082610.0	7.3796	77.6689	nan	7.9309	nan	nan	nan	nan	nan	nan	nan	nan
2019082611.0	7.5828	77.7168	-13.3497	6.2495	2.528	2.7875	1.9975	0.371	0.4219	0.4036	0.1586	2.533
2019082612.0	7.5834	77.7166	-10.7956	6.7892	1.6871	1.9674	1.7872	0.3346	0.3834	0.3411	0.0227	1.6873
2019082613.0	7.5834	77.7166	-9.0448	7.5624	1.6138	2.2311	1.6268	0.3663	0.4121	0.3378	0.121	1.6184
2019082614.0	7.5834	77.7166	-18.8874	9.2404	3.0853	4.1271	3.2613	0.513	0.582	0.5042	0.3756	3.1081
2019082615.0	7.9771	77.7019	nan	10.1821	nan	nan	nan	nan	nan	nan	nan	nan
2019082616.0	8.9775	77.6609	-24.8862	11.1641	2.7998	2.6646	2.4285	0.7422	0.8204	0.7551	0.177	2.8054
2019082617.0	10.0027	77.6167	-28.7439	12.1427	2.7138	2.9874	2.6742	0.7698	0.8569	0.7156	0.1746	2.7194
2019082618.0	11.0401	77.571	-25.2652	11.6538	3.1372	3.3843	3.6168	0.802	0.8739	0.9119	0.2448	3.1467
2019082619.0	12.0868	77.5292	-24.6155	10.1072	3.3451	3.9416	2.5989	0.7626	0.7921	0.9126	0.5504	3.3901
2019082620.0	13.1087	77.4873	nan	7.0371	nan	nan	nan	nan	nan	nan	nan	nan
2019082621.0	13.4934	77.4669	-14.8672	5.3063	2.994	3.0625	2.578	0.4003	0.4017	0.4266	0.1894	3.0
2019082622.0	13.4935	77.4668	-14.4824	6.7094	2.1507	3.0331	2.0787	0.4788	0.491	0.4427	0.0971	2.1528
2019082623.0	13.4936	77.4668	-12.4568	6.8818	2.1376	2.3394	2.1328	0.4556	0.4613	0.4522	0.1709	2.1444
2019082700.0	13.4936	77.4668	-12.309	6.0508	1.9626	2.0701	1.8609	0.4252	0.4316	0.4424	0.1791	1.9707
2019082701.0	13.4936	77.4668	-12.5137	7.5821	1.612	1.4527	1.632	0.5017	0.5051	0.5121	0.0702	1.6136
2019082702.0	13.4936	77.4668	-9.9539	6.8271	2.3873	1.9356	3.2846	0.4758	0.483	0.4378	0.1607	2.3927
2019082703.0	13.4936	77.4668	-16.9911	6.5262	2.797	3.7344	2.0349	0.5023	0.5057	0.4867	0.2852	2.8115
2019082704.0	13.4935	77.4668	-18.5887	8.0447	1.7489	1.701	1.8249	0.5849	0.5919	0.5655	0.0823	1.7509
2019082705.0	13.4936	77.4668	-18.5331	8.9739	2.2791	2.1836	2.1867	0.6777	0.7034	0.6251	0.1466	2.2838
2019082706.0	13.4935	77.4668	-22.5706	9.4826	2.6346	2.6391	2.9088	0.7789	0.7791	0.7433	0.1414	2.6384
2019082707.0	13.4935	77.4668	-22.8171	10.7535	2.455	2.7424	2.7302	0.8587	0.8666	0.8626	0.1255	2.4582
2019082708.0	13.4936	77.4668	-24.5379	10.5415	3.4483	3.1875	3.3551	0.8922	0.9073	0.8604	0.2249	3.4556
2019082709.0	13.4936	77.4668	-28.3034	11.3791	3.1527	3.0265	2.9615	0.8892	0.9327	0.7757	0.06	3.1533
2019082710.0	13.4936	77.4668	-24.9117	11.0027	2.5374	2.6033	2.4604	0.9293	0.9381	0.8685	0.1224	2.5404
2019082711.0	13.4453	77.5074	nan	10.6374	nan	nan	nan	nan	nan	nan	nan	nan
2019082712.0	13.2868	77.6613	-50.3235	17.5376	4.4296	4.802	4.3276	1.1935	1.3194	1.2877	0.3066	4.4402
2019082713.0	13.1426	77.8294	-46.8906	17.1388	4.0995	4.5307	3.9819	1.2079	1.3395	1.1567	0.1689	4.103
2019082714.0	12.9958	78.0046	nan	12.3419	nan	nan	nan	nan	nan	nan	nan	nan
2019082715.0	13.251	78.0726	nan	12.2422	nan	nan	nan	nan	nan	nan	nan	nan
2019082716.0	13.336	78.0702	-23.7122	13.0846	3.4376	3.5672	3.3788	0.9394	1.0173	0.93	0.1113	3.4394
2019082717.0	13.336	78.0701	-26.1493	12.9797	3.6061	4.3828	3.6487	1.0151	1.0982	1.1597	0.1812	3.6106
2019082718.0	13.336	78.0701	-22.4116	12.4208	4.0251	4.2591	3.1302	0.8937	0.9736	0.961	0.2886	4.0354
2019082719.0	13.3346	78.0707	nan	10.2766	nan	nan	nan	nan	nan	nan	nan	nan
2019082720.0	13.0866	78.0831	nan	7.8716	nan	nan	nan	nan	nan	nan	nan	nan
2019082721.0	12.6426	78.0952	nan	6.6882	nan	nan	nan	nan	nan	nan	nan	nan
2019082722.0	12.2078	78.1156	nan	7.7565	nan	nan	nan	nan	nan	nan	nan	nan
2019082723.0	11.7421	78.1458	nan	10.0689	nan	nan	nan	nan	nan	nan	nan	nan
2019082800.0	11.5645	78.1556	nan	11.8366	nan	nan	nan	nan	nan	nan	nan	nan
2019082801.0	11.7699	78.1328	-42.0462	12.3412	4.5289	4.2966	3.6731	1.0992	1.1395	1.1143	0.1766	4.5324
2019082802.0	11.9768	78.116	-39.1082	11.6323	3.5619	3.5452	3.3548	0.954	1.0079	0.9574	0.2699	3.5721
2019082803.0	12.1632	78.1166	-26.9693	10.5097	2.292	2.9027	2.3194	0.7608	0.8116	0.7819	0.1429	2.2965
2019082804.0	12.336	78.1188	-22.7905	8.8667	1.6899	2.0588	1.7441	0.5979	0.6611	0.6	0.1275	1.6947
2019082805.0	12.4905	78.1182	-18.802	8.6987	2.2486	2.0803	2.2409	0.6467	0.7077	0.6573	0.0763	2.2499
2019082806.0	12.6443	78.1186	-27.2196	nan	2.6608	2.6976	2.551	0.6975	0.7538	0.7399	0.2609	2.6736
2019082807.0	12.9744	78.1062	nan	nan	nan	nan	nan	nan	nan	nan	nan	nan
2019082808.0	13.3384	78.0722	-18.0991	nan	1.5159	2.2697	1.5906	0.5242	0.5807	0.5463	0.0954	1.5189
2019082809.0	13.3412	78.0709	-24.2989	nan	2.5463	2.1533	2.233	0.5581	0.6196	0.5741	0.166	2.5517
2019082810.0	13.3418	78.0713	nan	nan	nan	nan	nan	nan	nan	nan	nan	nan
2019082811.0	13.5746	78.1272	nan	nan	nan	nan	nan	nan	nan	nan	nan	nan
2019082812.0	14.2411	78.1856	-10.9811	nan	3.2279	3.3628	3.4314	0.406	0.4153	0.5964	0.4067	3.2535
2019082813.0	14.9087	78.2423	-0.9673	nan	2.2641	2.8109	2.1054	0.2672	0.2914	0.3175	0.3722	2.2945
2019082814.0	15.5097	78.2526	nan	nan	nan	nan	nan	nan	nan	nan	nan	nan
2019082815.0	15.5812	78.2376	nan	nan	nan	nan	nan	nan	nan	nan	nan	nan
2019082816.0	15.5811	78.2377	nan	nan	nan	nan	nan	nan	nan	nan	nan	nan
2019082817.0	15.5814	78.2378	nan	nan	nan	nan	nan	nan	nan	nan	nan	nan
2019082818.0	15.5811	78.2378	nan	nan	nan	nan	nan	nan	nan	nan	nan	nan
2019082819.0	15.581	78.2377	nan	nan	nan	nan	nan	nan	nan	nan	nan	nan
2019082820.0	15.5809	78.2377	nan	nan	nan	nan	nan	nan	nan	nan	nan	nan
2019082821.0	15.581	78.2378	nan	nan	nan	nan	nan	nan	nan	nan	nan	nan
2019082822.0	15.5808	78.2377	nan	nan	nan	nan	nan	nan	nan	nan	nan	nan
2019082823.0	15.5816	78.2378	nan	nan	nan	nan	nan	nan	nan	nan	nan	nan
2019082900.0	15.5812	78.2378	nan	nan	nan	nan	nan	nan	nan	nan	nan	nan
2019082901.0	15.5814	78.2378	nan	nan	nan	nan	nan	nan	nan	nan	nan	nan
2019082902.0	15.5816	78.2378	nan	nan	nan	nan	nan	nan	nan	nan	nan	nan
2019082903.0	15.5812	78.2377	nan	nan	nan	nan	nan	nan	nan	nan	nan	nan
2019082904.0	15.5813	78.2378	nan	nan	nan	nan	nan	nan	nan	nan	nan	nan
2019082905.0	15.5819	78.2378	nan	nan	nan	nan	nan	nan	nan	nan	nan	nan
2019082906.0	15.5814	78.2377	nan	nan	nan	nan	nan	nan	nan	nan	nan	nan
2019082907.0	15.5818	78.2377	nan	nan	nan	nan	nan	nan	nan	nan	nan	nan
2019082908.0	15.5819	78.2377	nan	nan	nan	nan	nan	nan	nan	nan	nan	nan
2019082909.0	15.5809	78.2377	nan	nan	nan	nan	nan	nan	nan	nan	nan	nan
2019082910.0	15.5809	78.2377	nan	nan	nan	nan	nan	nan	nan	nan	nan	nan
2019082911.0	15.5812	78.2378	3.8491	nan	1.3202	3.0091	1.5716	0.2879	0.2989	0.2777	0.1207	1.3257
